# Supplementary material
Source: publisher site journal article supplement (https://www.dovepress.com/get_supplementary_file.php?f=170858.xlsx)
Supplement: Supplementary file 1 [file get_supplementary_file.php]

## Sheet: gene_exp
test_id	gene_id	gene	locus	sample_1	sample_2	status	value_1	value_2	log2(fold_change)	test_stat	p_value	q_value	significant
MED14	MED14	MED14	chrX:40508794-40597953	Con	Knockdown	OK	11.2873	1.01222	-3.4791	-13.2126	5e-05	0.000119733	yes
ZNF32-AS1	ZNF32-AS1	ZNF32-AS1	chr10:44124264-44170147	Con	Knockdown	OK	14.3794	1.46026	-3.2997	-2.61919	0.0307	0.0485127	yes
IGFBP3	IGFBP3	IGFBP3	chr7:45951843-45960871	Con	Knockdown	OK	11.6856	1.43831	-3.02228	-9.7164	5e-05	0.000119733	yes
KIF11	KIF11	KIF11	chr10:94352824-94415152	Con	Knockdown	OK	45.7528	6.00548	-2.92951	-24.0743	5e-05	0.000119733	yes
PEG10	PEG10	PEG10	chr7:94285636-94299006	Con	Knockdown	OK	58.8278	9.21291	-2.67477	-33.9342	5e-05	0.000119733	yes
DNAJC8	DNAJC8	DNAJC8	chr1:28526789-28559542	Con	Knockdown	OK	96.0434	15.8807	-2.59642	-21.9716	5e-05	0.000119733	yes
ZNF32	ZNF32	ZNF32	chr10:44124264-44170147	Con	Knockdown	OK	12.8423	2.14529	-2.58165	-6.58812	5e-05	0.000119733	yes
JTB	JTB	JTB	chr1:153931574-153950451	Con	Knockdown	OK	40.9503	6.89912	-2.56939	-12.6928	5e-05	0.000119733	yes
RWDD4	RWDD4	RWDD4	chr4:184560787-184580372	Con	Knockdown	OK	28.9274	5.26195	-2.45876	-11.4288	5e-05	0.000119733	yes
MRPL20	MRPL20	MRPL20	chr1:1334909-1342693	Con	Knockdown	OK	81.6194	14.925	-2.45118	-11.2562	5e-05	0.000119733	yes
ZNRD1	ZNRD1	ZNRD1	chr6_ssto_hap7:1359459-1363126	Con	Knockdown	OK	23.3992	4.37882	-2.41784	-6.37268	5e-05	0.000119733	yes
MTHFS	MTHFS	MTHFS	chr15:80135888-80217196	Con	Knockdown	OK	6.54476	1.35347	-2.27368	-2.88032	0.0005	0.00107409	yes
LINC01111	LINC01111	LINC01111	chr8:77318888-77436567	Con	Knockdown	OK	5.41169	1.13101	-2.25846	-3.48148	5e-05	0.000119733	yes
SNORA25	SNORA25	SNORA25	chr11:93463680-93463812	Con	Knockdown	OK	35.015	7.59704	-2.20447	-6.2263	0.22835	0.290529	no
SEPHS2	SEPHS2	SEPHS2	chr16:30454945-30457296	Con	Knockdown	OK	19.8161	4.33148	-2.19374	-11.1852	5e-05	0.000119733	yes
PTPN11	PTPN11	PTPN11	chr12:112856535-112947717	Con	Knockdown	OK	88.7596	19.6686	-2.17401	-32.8926	5e-05	0.000119733	yes
BTBD10	BTBD10	BTBD10	chr11:13409542-13484844	Con	Knockdown	OK	23.5921	5.26927	-2.16263	-11.3602	5e-05	0.000119733	yes
H19	H19	H19	chr11:2012325-2022696	Con	Knockdown	OK	12.6509	2.83632	-2.15715	-6.2709	5e-05	0.000119733	yes
PCYOX1	PCYOX1	PCYOX1	chr2:70485230-70508317	Con	Knockdown	OK	17.4437	3.93399	-2.14864	-14.0261	5e-05	0.000119733	yes
YWHAQ	YWHAQ	YWHAQ	chr2:9724095-9771184	Con	Knockdown	OK	285.722	64.5242	-2.1467	-38.2536	5e-05	0.000119733	yes
C17orf58	C17orf58	C17orf58	chr17:65987214-65989765	Con	Knockdown	OK	11.2517	2.54963	-2.14179	-5.95272	5e-05	0.000119733	yes
ARL6IP6	ARL6IP6	ARL6IP6	chr2:153574406-153617767	Con	Knockdown	OK	29.0327	6.61172	-2.13458	-6.0712	5e-05	0.000119733	yes
PRIM1	PRIM1	PRIM1	chr12:57125363-57146146	Con	Knockdown	OK	75.8966	17.4772	-2.11856	-14.2959	5e-05	0.000119733	yes
PARN	PARN	PARN	chr16:14529556-14724128	Con	Knockdown	OK	17.7892	4.10212	-2.11656	-10.7295	5e-05	0.000119733	yes
CD83	CD83	CD83	chr6:14117486-14137148	Con	Knockdown	OK	12.8689	3.02569	-2.08855	-8.24431	5e-05	0.000119733	yes
C15orf48	C15orf48	C15orf48	chr15:45722726-45725647	Con	Knockdown	OK	41.2248	9.73333	-2.08251	-7.72319	5e-05	0.000119733	yes
TFAM	TFAM	TFAM	chr10:60144902-60158990	Con	Knockdown	OK	33.7059	8.42917	-1.99954	-17.1432	5e-05	0.000119733	yes
SNAP25	SNAP25	SNAP25	chr20:10004459-10288066	Con	Knockdown	OK	8.99793	2.27921	-1.98106	-5.35699	5e-05	0.000119733	yes
YAP1	YAP1	YAP1	chr11:101981191-102104154	Con	Knockdown	OK	60.3081	15.3909	-1.97028	-25.7748	5e-05	0.000119733	yes
ALDH1A1	ALDH1A1	ALDH1A1	chr9:75515577-75568233	Con	Knockdown	OK	18.6098	4.78273	-1.96016	-9.12287	5e-05	0.000119733	yes
MIR922	MIR922	MIR922	chr3:197398264-197511317	Con	Knockdown	OK	253.863	65.7226	-1.94959	-0.516629	0.3041	0.372503	no
COQ5	COQ5	COQ5	chr12:120941081-120966964	Con	Knockdown	OK	17.518	4.55306	-1.94393	-7.74605	5e-05	0.000119733	yes
CMBL	CMBL	CMBL	chr5:10277706-10308168	Con	Knockdown	OK	15.717	4.13949	-1.9248	-13.0706	5e-05	0.000119733	yes
TMSB4X	TMSB4X	TMSB4X	chrX:12993225-12995346	Con	Knockdown	OK	2570.23	687.271	-1.90295	-48.0818	5e-05	0.000119733	yes
TWF1	TWF1	TWF1	chr12:44187525-44200178	Con	Knockdown	OK	203.693	54.5913	-1.89966	-30.8419	5e-05	0.000119733	yes
SNORD21	SNORD21	SNORD21	chr1:93297593-93427079	Con	Knockdown	OK	116.067	31.3978	-1.88622	-13.8173	0.40745	0.478165	no
TENM2	TENM2	TENM2	chr5:166711842-167691162	Con	Knockdown	OK	15.6711	4.36099	-1.84538	-20.4764	5e-05	0.000119733	yes
LLGL1	LLGL1	LLGL1	chr17:18128935-18162230	Con	Knockdown	OK	18.4677	5.14734	-1.84311	-14.0008	5e-05	0.000119733	yes
VPS4B	VPS4B	VPS4B	chr18:61056424-61089752	Con	Knockdown	OK	19.5956	5.47148	-1.84053	-11.0204	5e-05	0.000119733	yes
GMNN	GMNN	GMNN	chr6:24775158-24786325	Con	Knockdown	OK	58.3414	16.5898	-1.81423	-10.8663	5e-05	0.000119733	yes
MIR614	MIR614	MIR614	chr12:13068762-13068852	Con	Knockdown	OK	183.308	52.3585	-1.80777	-1.50492	0.2497	0.313526	no
SNORA68	SNORA68	SNORA68	chr19:17970686-17974133	Con	Knockdown	OK	25.1973	7.22652	-1.8019	-5.06893	0.4616	0.531588	no
ADIPOR1	ADIPOR1	ADIPOR1	chr1:202909952-202927700	Con	Knockdown	OK	32.5292	9.41824	-1.78821	-12.2053	5e-05	0.000119733	yes
THNSL1	THNSL1	THNSL1	chr10:25270907-25351208	Con	Knockdown	OK	5.84149	1.70548	-1.77616	-5.80805	5e-05	0.000119733	yes
TUB	TUB	TUB	chr11:8060179-8190590	Con	Knockdown	OK	7.00279	2.05633	-1.76786	-10.2701	5e-05	0.000119733	yes
TBL1X	TBL1X	TBL1X	chrX:9431334-9687780	Con	Knockdown	OK	14.5429	4.27606	-1.76596	-13.6799	5e-05	0.000119733	yes
PPIG	PPIG	PPIG	chr2:170440849-170494254	Con	Knockdown	OK	30.976	9.14595	-1.75995	-14.0948	5e-05	0.000119733	yes
CYR61	CYR61	CYR61	chr1:86046443-86049648	Con	Knockdown	OK	192.743	58.3323	-1.72431	-30.3253	5e-05	0.000119733	yes
JAG1	JAG1	JAG1	chr20:10618331-10654694	Con	Knockdown	OK	7.39542	2.26434	-1.70754	-9.69002	5e-05	0.000119733	yes
LINC01444	LINC01444	LINC01444	chr18:14946265-14973755	Con	Knockdown	OK	19.2419	5.92487	-1.6994	-5.01444	5e-05	0.000119733	yes
CHCHD4	CHCHD4	CHCHD4	chr3:14153576-14166371	Con	Knockdown	OK	29.4509	9.1265	-1.69018	-9.31577	5e-05	0.000119733	yes
TSN	TSN	TSN	chr2:122513120-122525428	Con	Knockdown	OK	34.7054	10.7974	-1.68447	-13.4382	5e-05	0.000119733	yes
SKP2	SKP2	SKP2	chr5:36152144-36184142	Con	Knockdown	OK	30.296	9.43959	-1.68233	-11.7605	5e-05	0.000119733	yes
PAK2	PAK2	PAK2	chr3:196466727-196559518	Con	Knockdown	OK	60.6727	18.97	-1.67733	-24.2104	5e-05	0.000119733	yes
PPIA	PPIA	PPIA	chr7:44836234-44842722	Con	Knockdown	OK	567.954	177.921	-1.67454	-43.5251	5e-05	0.000119733	yes
COL6A1	COL6A1	COL6A1	chr21:47401662-47424963	Con	Knockdown	OK	4.00575	1.26622	-1.66154	-7.71507	5e-05	0.000119733	yes
VOPP1	VOPP1	VOPP1	chr7:55538300-55640200	Con	Knockdown	OK	42.0221	13.5635	-1.63142	-16.6147	5e-05	0.000119733	yes
MYH10	MYH10	MYH10	chr17:8377522-8534079	Con	Knockdown	OK	35.1314	11.3978	-1.62401	-24.9622	5e-05	0.000119733	yes
HADHA	HADHA	HADHA	chr2:26413503-26467594	Con	Knockdown	OK	101.375	32.9447	-1.62159	-24.9056	5e-05	0.000119733	yes
TCF7	TCF7	TCF7	chr5:133450401-133483920	Con	Knockdown	OK	3.31591	1.08301	-1.61436	-4.06295	5e-05	0.000119733	yes
PRPF31	PRPF31	PRPF31	chr19:54610319-54635150	Con	Knockdown	OK	56.6758	18.566	-1.61007	-17.5374	5e-05	0.000119733	yes
C10orf12	C10orf12	C10orf12	chr10:98741040-98745585	Con	Knockdown	OK	5.29552	1.73656	-1.60854	-7.36809	5e-05	0.000119733	yes
LAMP1	LAMP1	LAMP1	chr13:113951468-113977741	Con	Knockdown	OK	126.688	41.5475	-1.60845	-27.5621	5e-05	0.000119733	yes
HLTF-AS1	HLTF-AS1	HLTF-AS1	chr3:148747903-148820610	Con	Knockdown	OK	8.3872	2.7647	-1.60107	-1.36042	0.0302	0.0477813	yes
ADAMTS1	ADAMTS1	ADAMTS1	chr21:28208605-28217728	Con	Knockdown	OK	12.0026	3.96162	-1.59918	-11.0241	5e-05	0.000119733	yes
CUL4B	CUL4B	CUL4B	chrX:119658445-119709684	Con	Knockdown	OK	32.9463	10.9304	-1.59177	-15.8647	5e-05	0.000119733	yes
LINC00094	LINC00094	LINC00094	chr9:136890560-136933141	Con	Knockdown	OK	5.72702	1.90864	-1.58524	-8.55111	5e-05	0.000119733	yes
SNORA5A	SNORA5A	SNORA5A	chr7:45139698-45151346	Con	Knockdown	OK	30.6392	10.2414	-1.58096	-4.10894	0.3838	0.455114	no
HOXB-AS3	HOXB-AS3	HOXB-AS3	chr17:46667781-46683774	Con	Knockdown	OK	6.46875	2.18752	-1.56419	-1.36531	0.00115	0.00232916	yes
CA2	CA2	CA2	chr8:86351055-86393721	Con	Knockdown	OK	8.72676	2.96568	-1.55708	-4.49464	5e-05	0.000119733	yes
GCLM	GCLM	GCLM	chr1:94350755-94375154	Con	Knockdown	OK	47.3006	16.1472	-1.55057	-17.296	5e-05	0.000119733	yes
NUP43	NUP43	NUP43	chr6:150045451-150067708	Con	Knockdown	OK	45.6072	15.6858	-1.5398	-11.9072	5e-05	0.000119733	yes
ARHGAP10	ARHGAP10	ARHGAP10	chr4:148653452-148993927	Con	Knockdown	OK	7.97517	2.74411	-1.53918	-7.06558	5e-05	0.000119733	yes
TMEM38B	TMEM38B	TMEM38B	chr9:108456805-108538892	Con	Knockdown	OK	20.6889	7.12046	-1.53881	-9.08833	5e-05	0.000119733	yes
MIR663B	MIR663B	MIR663B	chr2:132905163-133015542	Con	Knockdown	OK	56.0969	19.3269	-1.53731	-4.01267	0.34255	0.413351	no
SMAD5	SMAD5	SMAD5	chr5:135465202-135518422	Con	Knockdown	OK	34.3261	11.8475	-1.53473	-17.2499	5e-05	0.000119733	yes
HAPLN1	HAPLN1	HAPLN1	chr5:82934016-83016896	Con	Knockdown	OK	50.2562	17.5054	-1.52151	-17.318	5e-05	0.000119733	yes
CD24	CD24	CD24	chrY:21034386-21438350	Con	Knockdown	OK	6.21759	2.17416	-1.5159	-3.35817	5e-05	0.000119733	yes
DYNLT3	DYNLT3	DYNLT3	chrX:37698088-37706889	Con	Knockdown	OK	17.318	6.07073	-1.51233	-6.42965	5e-05	0.000119733	yes
TIMM8B	TIMM8B	TIMM8B	chr11:111944967-111957522	Con	Knockdown	OK	56.065	19.6563	-1.51211	-6.17815	5e-05	0.000119733	yes
CMTM4	CMTM4	CMTM4	chr16:66648652-66730610	Con	Knockdown	OK	17.9304	6.29036	-1.5112	-10.6276	5e-05	0.000119733	yes
VAPA	VAPA	VAPA	chr18:9913954-9960018	Con	Knockdown	OK	28.1859	9.93519	-1.50435	-15.0455	5e-05	0.000119733	yes
G3BP1	G3BP1	G3BP1	chr5:151151475-151184915	Con	Knockdown	OK	193.055	68.3495	-1.49801	-28.5646	5e-05	0.000119733	yes
SCRN1	SCRN1	SCRN1	chr7:29959718-30029905	Con	Knockdown	OK	54.6839	19.3865	-1.49607	-22.7648	5e-05	0.000119733	yes
DDX47	DDX47	DDX47	chr12:12966279-12982915	Con	Knockdown	OK	95.9263	34.0592	-1.49388	-15.7497	5e-05	0.000119733	yes
FBXO9	FBXO9	FBXO9	chr6:52929795-52965670	Con	Knockdown	OK	15.7813	5.63131	-1.48667	-10.8543	5e-05	0.000119733	yes
PEAR1	PEAR1	PEAR1	chr1:156863522-156886226	Con	Knockdown	OK	3.04478	1.09105	-1.48062	-5.95208	5e-05	0.000119733	yes
RAB39A	RAB39A	RAB39A	chr11:107799200-107834208	Con	Knockdown	OK	2.80851	1.01051	-1.47471	-2.66375	0.0001	0.000231985	yes
FAM120AOS	FAM120AOS	FAM120AOS	chr9:96208781-96328397	Con	Knockdown	OK	9.26183	3.33904	-1.47186	-4.39159	5e-05	0.000119733	yes
G0S2	G0S2	G0S2	chr1:209848669-209849735	Con	Knockdown	OK	72.7198	26.298	-1.4674	-12.657	5e-05	0.000119733	yes
SYT16	SYT16	SYT16	chr14:62462540-62568427	Con	Knockdown	OK	4.28285	1.54976	-1.46653	-4.72227	5e-05	0.000119733	yes
PLK2	PLK2	PLK2	chr5:57749809-57755966	Con	Knockdown	OK	64.6109	23.4437	-1.46257	-17.6073	5e-05	0.000119733	yes
TGM2	TGM2	TGM2	chr20:36756863-36793700	Con	Knockdown	OK	182.801	66.3643	-1.46179	-33.4426	5e-05	0.000119733	yes
CYB5B	CYB5B	CYB5B	chr16:69458497-69500167	Con	Knockdown	OK	47.4221	17.2659	-1.45763	-16.7391	5e-05	0.000119733	yes
NRG1	NRG1	NRG1	chr8:31497267-32622558	Con	Knockdown	OK	32.7829	11.9603	-1.45469	-10.3134	5e-05	0.000119733	yes
SLC25A30	SLC25A30	SLC25A30	chr13:45967453-45994506	Con	Knockdown	OK	9.15987	3.34293	-1.45422	-6.46067	5e-05	0.000119733	yes
PMP22	PMP22	PMP22	chr17:15133093-15168674	Con	Knockdown	OK	30.3038	11.0609	-1.45404	-8.68602	5e-05	0.000119733	yes
ELAC2	ELAC2	ELAC2	chr17:12569206-12921381	Con	Knockdown	OK	30.1699	11.0831	-1.44475	-15.2694	5e-05	0.000119733	yes
MIR6084	MIR6084	MIR6084	chr1:20959947-20988037	Con	Knockdown	OK	69.6622	25.6586	-1.44093	-0.48463	0.33815	0.408851	no
HNRNPAB	HNRNPAB	HNRNPAB	chr5:177631507-177659823	Con	Knockdown	OK	253.881	93.9779	-1.43376	-28.9363	5e-05	0.000119733	yes
CHML	CHML	CHML	chr1:241695433-241803701	Con	Knockdown	OK	22.5612	8.3698	-1.43058	-12.169	5e-05	0.000119733	yes
TMEM106B	TMEM106B	TMEM106B	chr7:12250847-12276890	Con	Knockdown	OK	10.0507	3.7386	-1.42672	-7.59545	5e-05	0.000119733	yes
C19orf66	C19orf66	C19orf66	chr19:10196794-10213425	Con	Knockdown	OK	5.07247	1.89302	-1.42199	-4.94478	5e-05	0.000119733	yes
MIB1	MIB1	MIB1	chr18:19321289-19450918	Con	Knockdown	OK	15.737	5.87939	-1.42042	-13.1771	5e-05	0.000119733	yes
MBNL1	MBNL1	MBNL1	chr3:151980404-152183569	Con	Knockdown	OK	65.7566	24.7063	-1.41226	-19.7368	5e-05	0.000119733	yes
DPYSL2	DPYSL2	DPYSL2	chr8:26371708-26515693	Con	Knockdown	OK	25.9826	9.77132	-1.41092	-14.1402	5e-05	0.000119733	yes
LHFP	LHFP	LHFP	chr13:39917028-40177356	Con	Knockdown	OK	4.2662	1.60988	-1.406	-4.23315	5e-05	0.000119733	yes
PRRT3-AS1	PRRT3-AS1	PRRT3-AS1	chr3:9987225-9996471	Con	Knockdown	OK	12.3783	4.67479	-1.40484	-2.5051	0.0005	0.00107409	yes
DAZAP2	DAZAP2	DAZAP2	chr12:51632507-51664202	Con	Knockdown	OK	98.016	37.1497	-1.39967	-15.0613	5e-05	0.000119733	yes
CDCA7L	CDCA7L	CDCA7L	chr7:21582832-21985542	Con	Knockdown	OK	27.9716	10.6053	-1.39918	-11.1247	5e-05	0.000119733	yes
SNRPN	SNRPN	SNRPN	chr15:25068793-25223729	Con	Knockdown	OK	5.42065	2.0559	-1.3987	-1.42473	0.0446	0.0683788	no
MTHFD1L	MTHFD1L	MTHFD1L	chr6:151186814-151423023	Con	Knockdown	OK	57.6845	21.8985	-1.39735	-10.1127	5e-05	0.000119733	yes
LACTB	LACTB	LACTB	chr15:63413998-63434264	Con	Knockdown	OK	37.4104	14.2243	-1.39508	-11.1733	5e-05	0.000119733	yes
CDT1	CDT1	CDT1	chr16:88870185-88875666	Con	Knockdown	OK	26.5891	10.1176	-1.39397	-12.7463	5e-05	0.000119733	yes
HCFC1R1	HCFC1R1	HCFC1R1	chr16:3072620-3077756	Con	Knockdown	OK	42.1986	16.0603	-1.39369	-5.30592	5e-05	0.000119733	yes
POLR3GL	POLR3GL	POLR3GL	chr1:144146810-146467744	Con	Knockdown	OK	13.1234	5.01151	-1.38883	-4.23475	5e-05	0.000119733	yes
OLMALINC	OLMALINC	OLMALINC	chr10:102133332-102148111	Con	Knockdown	OK	17.7354	6.77376	-1.3886	-5.6148	5e-05	0.000119733	yes
CYB5R3	CYB5R3	CYB5R3	chr22:43013845-43045405	Con	Knockdown	OK	42.3556	16.2339	-1.38355	-16.8353	5e-05	0.000119733	yes
PRDX3	PRDX3	PRDX3	chr10:120927210-120938377	Con	Knockdown	OK	208.537	80.1482	-1.37956	-15.3755	5e-05	0.000119733	yes
KRT18	KRT18	KRT18	chr12:53290970-53346685	Con	Knockdown	OK	146.952	56.5321	-1.37821	-21.1193	5e-05	0.000119733	yes
CINP	CINP	CINP	chr14:102814618-102829253	Con	Knockdown	OK	26.9887	10.384	-1.378	-6.55406	5e-05	0.000119733	yes
PLAC8	PLAC8	PLAC8	chr4:84011210-84035911	Con	Knockdown	OK	8.8885	3.42523	-1.37574	-3.33573	5e-05	0.000119733	yes
NEO1	NEO1	NEO1	chr15:73344824-73597547	Con	Knockdown	OK	7.20888	2.78761	-1.37075	-9.1824	5e-05	0.000119733	yes
SLC35B4	SLC35B4	SLC35B4	chr7:133974089-134001827	Con	Knockdown	OK	11.5816	4.47912	-1.37055	-10.4071	5e-05	0.000119733	yes
RASSF7	RASSF7	RASSF7	chr11:560970-564025	Con	Knockdown	OK	9.00463	3.4931	-1.36616	-5.39397	5e-05	0.000119733	yes
RNF182	RNF182	RNF182	chr6:13924676-13980240	Con	Knockdown	OK	45.5932	17.7219	-1.36328	-13.8428	5e-05	0.000119733	yes
AGPAT3	AGPAT3	AGPAT3	chr21:45285115-45407475	Con	Knockdown	OK	17.0727	6.65297	-1.35962	-14.4413	5e-05	0.000119733	yes
TLN1	TLN1	TLN1	chr9:35697333-35749225	Con	Knockdown	OK	72.8298	28.5194	-1.35259	-29.9295	5e-05	0.000119733	yes
NUDT2	NUDT2	NUDT2	chr9:34329503-34343711	Con	Knockdown	OK	28.8454	11.3263	-1.34866	-6.00922	5e-05	0.000119733	yes
APOBEC3B-AS1	APOBEC3B-AS1	APOBEC3B-AS1	chr22:39353526-39394225	Con	Knockdown	OK	8.14981	3.20959	-1.34438	-2.56233	0.0006	0.00127262	yes
PWP1	PWP1	PWP1	chr12:108079589-108106257	Con	Knockdown	OK	59.6914	23.5642	-1.34093	-12.396	5e-05	0.000119733	yes
POLE3	POLE3	POLE3	chr9:116169517-116191964	Con	Knockdown	OK	41.4577	16.3662	-1.34092	-11.5688	5e-05	0.000119733	yes
TMEM170B	TMEM170B	TMEM170B	chr6:11538459-11583757	Con	Knockdown	OK	7.73114	3.05282	-1.34054	-7.80401	5e-05	0.000119733	yes
RASL11A	RASL11A	RASL11A	chr13:27844463-27847827	Con	Knockdown	OK	8.60133	3.39827	-1.33976	-4.89865	5e-05	0.000119733	yes
FSD1	FSD1	FSD1	chr19:4304590-4323843	Con	Knockdown	OK	17.7766	7.06088	-1.33206	-8.16551	5e-05	0.000119733	yes
ATP1B3	ATP1B3	ATP1B3	chr3:141595469-141645382	Con	Knockdown	OK	177.862	70.7267	-1.33043	-20.5698	5e-05	0.000119733	yes
SELT	SELT	SELT	chr3:150321065-150348234	Con	Knockdown	OK	63.1377	25.1627	-1.32722	-13.78	5e-05	0.000119733	yes
MAT2B	MAT2B	MAT2B	chr5:162930069-162946359	Con	Knockdown	OK	64.8295	25.8937	-1.32405	-12.9006	5e-05	0.000119733	yes
BPHL	BPHL	BPHL	chr6:3118609-3153432	Con	Knockdown	OK	6.59588	2.63667	-1.32285	-4.55522	5e-05	0.000119733	yes
DEGS1	DEGS1	DEGS1	chr1:224370909-224381142	Con	Knockdown	OK	41.7097	16.6977	-1.32074	-10.0454	5e-05	0.000119733	yes
IL1RAPL1	IL1RAPL1	IL1RAPL1	chrX:28605680-29974017	Con	Knockdown	OK	3.38535	1.35807	-1.31775	-3.43602	5e-05	0.000119733	yes
MOCOS	MOCOS	MOCOS	chr18:33767479-33848685	Con	Knockdown	OK	2.58448	1.03758	-1.31665	-3.49181	5e-05	0.000119733	yes
TIMELESS	TIMELESS	TIMELESS	chr12:56810156-56843200	Con	Knockdown	OK	30.1858	12.1323	-1.31501	-17.0776	5e-05	0.000119733	yes
SNORA10	SNORA10	SNORA10	chr16:2012061-2014827	Con	Knockdown	OK	59.8318	24.1044	-1.31162	-0.657582	0.30105	0.369197	no
ARL4C	ARL4C	ARL4C	chr2:235401685-235405697	Con	Knockdown	OK	34.806	14.0583	-1.30792	-14.0901	5e-05	0.000119733	yes
ADGRB2	ADGRB2	ADGRB2	chr1:32192705-32229664	Con	Knockdown	OK	10.3749	4.19048	-1.30791	-10.5039	5e-05	0.000119733	yes
COPB2	COPB2	COPB2	chr3:139076432-139108522	Con	Knockdown	OK	107.365	43.3822	-1.30735	-20.5178	5e-05	0.000119733	yes
LRRC3	LRRC3	LRRC3	chr21:45875368-45878739	Con	Knockdown	OK	3.99393	1.61409	-1.30709	-4.35001	5e-05	0.000119733	yes
TMEM251	TMEM251	TMEM251	chr14:93651295-93653431	Con	Knockdown	OK	21.556	8.71692	-1.3062	-4.35732	5e-05	0.000119733	yes
ZNF444	ZNF444	ZNF444	chr19:56652534-56672262	Con	Knockdown	OK	15.5976	6.30791	-1.30609	-8.10629	5e-05	0.000119733	yes
C10orf10	C10orf10	C10orf10	chr10:45455218-45500777	Con	Knockdown	OK	14.6317	5.92199	-1.30494	-6.75544	5e-05	0.000119733	yes
HES7	HES7	HES7	chr17:8023907-8027410	Con	Knockdown	OK	8.4181	3.40771	-1.30469	-5.0672	5e-05	0.000119733	yes
MESDC1	MESDC1	MESDC1	chr15:81293294-81296345	Con	Knockdown	OK	9.63936	3.9064	-1.3031	-7.08543	5e-05	0.000119733	yes
ME1	ME1	ME1	chr6:83920109-84140938	Con	Knockdown	OK	17.302	7.01221	-1.303	-8.34899	5e-05	0.000119733	yes
RNF20	RNF20	RNF20	chr9:104296130-104325626	Con	Knockdown	OK	19.2487	7.80318	-1.30263	-11.2686	5e-05	0.000119733	yes
GXYLT1	GXYLT1	GXYLT1	chr12:42475647-42538673	Con	Knockdown	OK	23.9815	9.73389	-1.30084	-13.3066	5e-05	0.000119733	yes
ACAT2	ACAT2	ACAT2	chr6:160181290-160210735	Con	Knockdown	OK	64.1114	26.0288	-1.30047	-6.71296	5e-05	0.000119733	yes
FAM133A	FAM133A	FAM133A	chrX:92929011-92967273	Con	Knockdown	OK	11.2353	4.57039	-1.29765	-5.81113	5e-05	0.000119733	yes
SLC16A7	SLC16A7	SLC16A7	chr12:59989820-60183635	Con	Knockdown	OK	3.4572	1.40746	-1.29651	-5.49808	5e-05	0.000119733	yes
FANCD2	FANCD2	FANCD2	chr3:10068112-10149915	Con	Knockdown	OK	22.8871	9.34285	-1.2926	-12.4663	5e-05	0.000119733	yes
SLC5A3	SLC5A3	SLC5A3	chr21:35445822-35515334	Con	Knockdown	OK	10.3097	4.2108	-1.29184	-9.6074	5e-05	0.000119733	yes
SMAD1-AS1	SMAD1-AS1	SMAD1-AS1	chr4:146402950-146480325	Con	Knockdown	OK	10.5557	4.31287	-1.2913	-2.128	0.0021	0.00406693	yes
LOC93622	LOC93622	LOC93622	chr4:6675820-6677774	Con	Knockdown	OK	12.417	5.08629	-1.28763	-5.36131	5e-05	0.000119733	yes
FOXD1	FOXD1	FOXD1	chr5:72742084-72744352	Con	Knockdown	OK	62.2805	25.5358	-1.28626	-15.2777	5e-05	0.000119733	yes
GZF1	GZF1	GZF1	chr20:23345020-23353683	Con	Knockdown	OK	14.9592	6.1495	-1.28249	-10.0949	5e-05	0.000119733	yes
SNORD1C	SNORD1C	SNORD1C	chr17:74553845-74561430	Con	Knockdown	OK	155.967	64.4923	-1.27404	-13.9434	0.47825	0.548147	no
PI4K2B	PI4K2B	PI4K2B	chr4:25235652-25280831	Con	Knockdown	OK	14.5066	6.01496	-1.27008	-7.25955	5e-05	0.000119733	yes
ARL2BP	ARL2BP	ARL2BP	chr16:57279037-57287545	Con	Knockdown	OK	52.4539	21.75	-1.27003	-11.6259	5e-05	0.000119733	yes
EFCAB2	EFCAB2	EFCAB2	chr1:245128505-245288530	Con	Knockdown	OK	6.28508	2.60708	-1.26949	-2.38162	0.0002	0.000450525	yes
VSTM1	VSTM1	VSTM1	chr19:54544079-54567207	Con	Knockdown	OK	24.6034	10.209	-1.26902	-4.78062	5e-05	0.000119733	yes
MESDC2	MESDC2	MESDC2	chr15:81071683-81282219	Con	Knockdown	OK	13.3171	5.52734	-1.26862	-8.21578	5e-05	0.000119733	yes
ITGBL1	ITGBL1	ITGBL1	chr13:102104943-103054124	Con	Knockdown	OK	16.1117	6.68882	-1.26828	-6.1409	5e-05	0.000119733	yes
HLTF	HLTF	HLTF	chr3:148747903-148820610	Con	Knockdown	OK	73.8497	30.7007	-1.26632	-19.5545	5e-05	0.000119733	yes
RAI14	RAI14	RAI14	chr5:34656432-34832717	Con	Knockdown	OK	33.0949	13.7744	-1.26462	-14.9942	5e-05	0.000119733	yes
FHL2	FHL2	FHL2	chr2:105977282-106055230	Con	Knockdown	OK	92.8736	38.6554	-1.2646	-13.7632	5e-05	0.000119733	yes
B4GALT6	B4GALT6	B4GALT6	chr18:29202208-29264686	Con	Knockdown	OK	16.1855	6.73846	-1.26422	-8.44063	5e-05	0.000119733	yes
TRIM25	TRIM25	TRIM25	chr17:54965269-54991409	Con	Knockdown	OK	22.1657	9.26408	-1.25861	-14.0954	5e-05	0.000119733	yes
EXOSC6	EXOSC6	EXOSC6	chr16:70284133-70285833	Con	Knockdown	OK	20.0927	8.41816	-1.25509	-6.87165	5e-05	0.000119733	yes
TTC33	TTC33	TTC33	chr5:40711677-40756072	Con	Knockdown	OK	12.5664	5.27831	-1.25143	-7.80009	5e-05	0.000119733	yes
FBXL17	FBXL17	FBXL17	chr5:107194733-107717799	Con	Knockdown	OK	6.03611	2.53647	-1.2508	-6.04952	5e-05	0.000119733	yes
TGFBI	TGFBI	TGFBI	chr5:135364583-135399507	Con	Knockdown	OK	67.4092	28.3269	-1.25077	-18.2416	5e-05	0.000119733	yes
LINC00601	LINC00601	LINC00601	chr10:128102437-128110448	Con	Knockdown	OK	4.98512	2.10032	-1.24702	-2.49054	0.00015	0.000342018	yes
TMCC1-AS1	TMCC1-AS1	TMCC1-AS1	chr3:129612713-129627755	Con	Knockdown	OK	9.39833	3.96187	-1.24622	-6.46319	5e-05	0.000119733	yes
EPT1	EPT1	EPT1	chr2:26531040-26618759	Con	Knockdown	OK	15.3473	6.47643	-1.24472	-10.7989	5e-05	0.000119733	yes
LINC00706	LINC00706	LINC00706	chr10:6816264-6821142	Con	Knockdown	OK	3.3764	1.42613	-1.24338	-1.33258	0.0166	0.0275825	yes
PDCD2	PDCD2	PDCD2	chr6:170884659-170893780	Con	Knockdown	OK	75.697	32.0247	-1.24105	-12.2312	5e-05	0.000119733	yes
GPRASP2	GPRASP2	GPRASP2	chrX:101854095-101972661	Con	Knockdown	OK	7.79179	3.30323	-1.23808	-2.9395	5e-05	0.000119733	yes
ARHGEF10	ARHGEF10	ARHGEF10	chr8:1772141-1906807	Con	Knockdown	OK	15.6291	6.63341	-1.23641	-12.2421	5e-05	0.000119733	yes
INSIG2	INSIG2	INSIG2	chr2:118846049-118867597	Con	Knockdown	OK	6.89272	2.93261	-1.23289	-3.93875	5e-05	0.000119733	yes
HRSP12	HRSP12	HRSP12	chr8:99114566-99129418	Con	Knockdown	OK	62.846	26.8336	-1.22778	-7.78771	5e-05	0.000119733	yes
VDAC1	VDAC1	VDAC1	chr5:133307565-133340824	Con	Knockdown	OK	265.904	113.602	-1.22692	-26.0225	5e-05	0.000119733	yes
CCL2	CCL2	CCL2	chr17:32582295-32584220	Con	Knockdown	OK	81.0401	34.6788	-1.22458	-7.71943	5e-05	0.000119733	yes
NUAK2	NUAK2	NUAK2	chr1:205271190-205290919	Con	Knockdown	OK	4.48232	1.9228	-1.22104	-5.12943	5e-05	0.000119733	yes
TMEM173	TMEM173	TMEM173	chr5:138855112-138862375	Con	Knockdown	OK	2.86288	1.2301	-1.21869	-2.8226	0.00015	0.000342018	yes
FSTL3	FSTL3	FSTL3	chr19:676388-683392	Con	Knockdown	OK	10.6381	4.57257	-1.21817	-7.29257	5e-05	0.000119733	yes
MIR5096	MIR5096	MIR5096	chr4:79697531-79833341	Con	Knockdown	OK	180.579	77.6437	-1.21769	-13.2629	0.46815	0.538115	no
CCDC90B	CCDC90B	CCDC90B	chr11:82970134-82997450	Con	Knockdown	OK	13.928	5.99939	-1.21511	-7.39041	5e-05	0.000119733	yes
NOG	NOG	NOG	chr17:54671059-54672951	Con	Knockdown	OK	5.71888	2.46469	-1.21433	-4.15359	5e-05	0.000119733	yes
CPED1	CPED1	CPED1	chr7:120628750-120937498	Con	Knockdown	OK	19.8902	8.62335	-1.20574	-10.088	5e-05	0.000119733	yes
LINC01057	LINC01057	LINC01057	chr1:95123088-95285837	Con	Knockdown	OK	42.7202	18.5375	-1.20447	-9.27327	5e-05	0.000119733	yes
SLC44A1	SLC44A1	SLC44A1	chr9:108006893-108159628	Con	Knockdown	OK	8.64871	3.77705	-1.19523	-9.26689	5e-05	0.000119733	yes
NDRG3	NDRG3	NDRG3	chr20:35280168-35374541	Con	Knockdown	OK	46.5094	20.3193	-1.19467	-13.2602	5e-05	0.000119733	yes
GAS6-AS2	GAS6-AS2	GAS6-AS2	chr13:114567149-114569805	Con	Knockdown	OK	3.95948	1.73603	-1.18952	-2.98229	5e-05	0.000119733	yes
SPRYD4	SPRYD4	SPRYD4	chr12:56862300-56882198	Con	Knockdown	OK	9.46559	4.15858	-1.1866	-5.12378	5e-05	0.000119733	yes
LINC01604	LINC01604	LINC01604	chr8:144362324-144363870	Con	Knockdown	OK	14.3179	6.29275	-1.18606	-2.33119	0.00035	0.000765782	yes
POGLUT1	POGLUT1	POGLUT1	chr3:119187784-119213554	Con	Knockdown	OK	8.37544	3.68487	-1.18455	-5.27028	5e-05	0.000119733	yes
DKK1	DKK1	DKK1	chr10:54074040-54077417	Con	Knockdown	OK	6.72085	2.96464	-1.18079	-3.56285	5e-05	0.000119733	yes
WBP11	WBP11	WBP11	chr12:14939411-14956401	Con	Knockdown	OK	82.3916	36.3572	-1.18026	-18.4515	5e-05	0.000119733	yes
TCEA1	TCEA1	TCEA1	chr8:54879113-54935016	Con	Knockdown	OK	173.595	76.691	-1.1786	-20.2158	5e-05	0.000119733	yes
CBWD1	CBWD1	CBWD1	chr9:121037-179075	Con	Knockdown	OK	10.9631	4.84797	-1.1772	-4.41198	5e-05	0.000119733	yes
ASPH	ASPH	ASPH	chr8:62200524-62627199	Con	Knockdown	OK	86.3401	38.3515	-1.17075	-18.4012	5e-05	0.000119733	yes
WDFY1	WDFY1	WDFY1	chr2:224740059-224810104	Con	Knockdown	OK	21.6694	9.65206	-1.16675	-10.218	5e-05	0.000119733	yes
NRAS	NRAS	NRAS	chr1:115247084-115259515	Con	Knockdown	OK	74.7839	33.3424	-1.16537	-17.6031	5e-05	0.000119733	yes
RAP2C	RAP2C	RAP2C	chrX:131337051-131623996	Con	Knockdown	OK	23.2315	10.3632	-1.16461	-7.64291	5e-05	0.000119733	yes
AJUBA	AJUBA	AJUBA	chr14:23440382-23451851	Con	Knockdown	OK	25.4929	11.38	-1.1636	-11.0655	5e-05	0.000119733	yes
TRAP1	TRAP1	TRAP1	chr16:3702939-3767598	Con	Knockdown	OK	76.3226	34.1023	-1.16224	-15.604	5e-05	0.000119733	yes
NOP14	NOP14	NOP14	chr4:2937272-2965233	Con	Knockdown	OK	15.9364	7.12621	-1.16111	-8.50935	5e-05	0.000119733	yes
HIST1H2AM	HIST1H2AM	HIST1H2AM	chr6:27860476-27860963	Con	Knockdown	OK	3.15767	1.41567	-1.15738	-1.17167	0.03875	0.0601261	no
LOC100268168	LOC100268168	LOC100268168	chr5:172381785-172386371	Con	Knockdown	OK	3.59527	1.61334	-1.15605	-2.38271	0.00045	0.000972635	yes
TRHDE-AS1	TRHDE-AS1	TRHDE-AS1	chr12:72647286-73059422	Con	Knockdown	OK	3.18733	1.43178	-1.15453	-2.44696	0.0001	0.000231985	yes
RAP2A	RAP2A	RAP2A	chr13:98086474-98120252	Con	Knockdown	OK	28.4461	12.7796	-1.15439	-10.9327	5e-05	0.000119733	yes
MRPS35	MRPS35	MRPS35	chr12:27863705-27909237	Con	Knockdown	OK	84.5285	38.0169	-1.1528	-12.5193	5e-05	0.000119733	yes
LOC100289361	LOC100289361	LOC100289361	chr3:142682899-142720309	Con	Knockdown	OK	2.86283	1.28788	-1.15244	-1.11852	0.0454	0.0694858	no
CORO1C	CORO1C	CORO1C	chr12:109038884-109125326	Con	Knockdown	OK	103.78	46.7622	-1.15012	-21.9768	5e-05	0.000119733	yes
EGFR	EGFR	EGFR	chr7:55086724-55275031	Con	Knockdown	OK	21.3474	9.62226	-1.14961	-8.59388	5e-05	0.000119733	yes
PLCXD3	PLCXD3	PLCXD3	chr5:41307047-41510730	Con	Knockdown	OK	2.4611	1.11006	-1.14867	-4.31584	5e-05	0.000119733	yes
CTBS	CTBS	CTBS	chr1:84944919-85040163	Con	Knockdown	OK	12.7477	5.75204	-1.14809	-5.32689	5e-05	0.000119733	yes
MRPS26	MRPS26	MRPS26	chr20:3026674-3028896	Con	Knockdown	OK	84.7196	38.2485	-1.14729	-11.6827	5e-05	0.000119733	yes
CNPY3	CNPY3	CNPY3	chr6:42896859-42907008	Con	Knockdown	OK	26.8531	12.1278	-1.14678	-8.80699	5e-05	0.000119733	yes
SLC8A1	SLC8A1	SLC8A1	chr2:40144773-40739575	Con	Knockdown	OK	6.5489	2.95863	-1.14633	-6.11784	5e-05	0.000119733	yes
PLGRKT	PLGRKT	PLGRKT	chr9:5357966-5437937	Con	Knockdown	OK	43.0101	19.4512	-1.14481	-6.9458	5e-05	0.000119733	yes
APOBEC3B	APOBEC3B	APOBEC3B	chr22:39353526-39394225	Con	Knockdown	OK	51.3154	23.2108	-1.1446	-9.76691	5e-05	0.000119733	yes
GOLIM4	GOLIM4	GOLIM4	chr3:167726460-167813713	Con	Knockdown	OK	17.406	7.89932	-1.13978	-10.1802	5e-05	0.000119733	yes
CRABP2	CRABP2	CRABP2	chr1:156669399-156675608	Con	Knockdown	OK	2.84141	1.28981	-1.13945	-2.04324	0.0015	0.0029756	yes
SNX30	SNX30	SNX30	chr9:115513133-115637267	Con	Knockdown	OK	4.38245	1.98945	-1.13936	-6.32311	5e-05	0.000119733	yes
ARPP19	ARPP19	ARPP19	chr15:52839241-52861643	Con	Knockdown	OK	49.2717	22.3777	-1.1387	-14.1124	5e-05	0.000119733	yes
TUFT1	TUFT1	TUFT1	chr1:151512780-151556059	Con	Knockdown	OK	14.9391	6.79019	-1.13757	-7.87443	5e-05	0.000119733	yes
TSC22D3	TSC22D3	TSC22D3	chrX:106956451-107019017	Con	Knockdown	OK	4.54999	2.07014	-1.13614	-3.18808	5e-05	0.000119733	yes
OBSL1	OBSL1	OBSL1	chr2:220415449-220436268	Con	Knockdown	OK	6.93712	3.15827	-1.1352	-6.66231	5e-05	0.000119733	yes
POP5	POP5	POP5	chr12:121016847-121019201	Con	Knockdown	OK	18.6113	8.48938	-1.13245	-3.90545	5e-05	0.000119733	yes
MRM1	MRM1	MRM1	chr17:34958024-34965407	Con	Knockdown	OK	5.93429	2.70963	-1.13098	-4.28595	5e-05	0.000119733	yes
SLC39A10	SLC39A10	SLC39A10	chr2:196521531-196602426	Con	Knockdown	OK	23.3112	10.6451	-1.13084	-10.0269	5e-05	0.000119733	yes
ARHGEF40	ARHGEF40	ARHGEF40	chr14:21484921-21572863	Con	Knockdown	OK	9.70125	4.43416	-1.12951	-9.60591	5e-05	0.000119733	yes
TPTEP1	TPTEP1	TPTEP1	chr22:17082800-17129720	Con	Knockdown	OK	2.52391	1.15527	-1.12744	-2.22144	0.00125	0.00251673	yes
XRN2	XRN2	XRN2	chr20:21283941-21370463	Con	Knockdown	OK	158.744	72.8113	-1.12446	-24.1885	5e-05	0.000119733	yes
TOPORS	TOPORS	TOPORS	chr9:32540541-32573182	Con	Knockdown	OK	21.9058	10.0514	-1.12391	-8.01041	5e-05	0.000119733	yes
RANBP6	RANBP6	RANBP6	chr9:6011018-6015640	Con	Knockdown	OK	25.749	11.8183	-1.12349	-8.70391	5e-05	0.000119733	yes
SNORD63	SNORD63	SNORD63	chr5:137890570-137911318	Con	Knockdown	OK	517.613	237.65	-1.12304	-0.641973	0.5141	0.581866	no
LOC101928307	LOC101928307	LOC101928307	chr6:69342554-69344216	Con	Knockdown	OK	2.97553	1.36634	-1.12283	-0.820942	0.1501	0.201648	no
PNMA2	PNMA2	PNMA2	chr8:26362195-26371483	Con	Knockdown	OK	18.8312	8.657	-1.12118	-10.808	5e-05	0.000119733	yes
LSM6	LSM6	LSM6	chr4:147096834-147111213	Con	Knockdown	OK	48.9363	22.5071	-1.12053	-5.77656	5e-05	0.000119733	yes
MRPL15	MRPL15	MRPL15	chr8:55047780-55061074	Con	Knockdown	OK	72.9217	33.5715	-1.11911	-11.8612	5e-05	0.000119733	yes
AMIGO2	AMIGO2	AMIGO2	chr12:47469489-47630446	Con	Knockdown	OK	21.5876	9.95713	-1.1164	-8.68029	5e-05	0.000119733	yes
CPNE7	CPNE7	CPNE7	chr16:89642175-89663654	Con	Knockdown	OK	9.50345	4.38651	-1.11538	-6.43404	5e-05	0.000119733	yes
MARVELD1	MARVELD1	MARVELD1	chr10:99473464-99477909	Con	Knockdown	OK	21.8356	10.0912	-1.11359	-9.89003	5e-05	0.000119733	yes
MATK	MATK	MATK	chr19:3708334-3987432	Con	Knockdown	OK	12.6858	5.86634	-1.11268	-3.71998	5e-05	0.000119733	yes
GULP1	GULP1	GULP1	chr2:189156395-189460652	Con	Knockdown	OK	3.91248	1.80975	-1.1123	-2.86746	5e-05	0.000119733	yes
RAD51B	RAD51B	RAD51B	chr14:68286495-69062738	Con	Knockdown	OK	4.87774	2.26011	-1.10982	-2.83083	5e-05	0.000119733	yes
RBM24	RBM24	RBM24	chr6:17281808-17294099	Con	Knockdown	OK	13.4352	6.23653	-1.1072	-4.82498	5e-05	0.000119733	yes
CNIH1	CNIH1	CNIH1	chr14:54893646-54908148	Con	Knockdown	OK	127.62	59.3201	-1.10526	-11.7979	5e-05	0.000119733	yes
PRR16	PRR16	PRR16	chr5:119799972-120023025	Con	Knockdown	OK	7.92962	3.69366	-1.1022	-3.5762	5e-05	0.000119733	yes
LRR1	LRR1	LRR1	chr14:50065414-50081390	Con	Knockdown	OK	31.0895	14.4824	-1.10212	-6.59812	5e-05	0.000119733	yes
FANCD2OS	FANCD2OS	FANCD2OS	chr3:10068112-10149915	Con	Knockdown	OK	2.52313	1.17583	-1.10153	-1.24659	0.038	0.0590494	no
FKBP9	FKBP9	FKBP9	chr7:32997015-33046543	Con	Knockdown	OK	7.85907	3.66356	-1.10111	-5.82835	5e-05	0.000119733	yes
LOC101928794	LOC101928794	LOC101928794	chr5:65892175-66465423	Con	Knockdown	OK	2.43415	1.1357	-1.09984	-1.05193	0.0857	0.122475	no
HIRIP3	HIRIP3	HIRIP3	chr16:30003641-30007417	Con	Knockdown	OK	6.9854	3.25926	-1.0998	-5.87023	5e-05	0.000119733	yes
GINS4	GINS4	GINS4	chr8:41386724-41482520	Con	Knockdown	OK	13.626	6.36061	-1.09912	-6.24175	5e-05	0.000119733	yes
TMEM134	TMEM134	TMEM134	chr11:67231818-67236748	Con	Knockdown	OK	18.3837	8.59099	-1.09753	-4.45132	5e-05	0.000119733	yes
FAM120A	FAM120A	FAM120A	chr9:96208781-96328397	Con	Knockdown	OK	66.0898	30.8886	-1.09735	-18.6645	5e-05	0.000119733	yes
LMO4	LMO4	LMO4	chr1:87794150-87814607	Con	Knockdown	OK	18.3022	8.58918	-1.09142	-9.54231	5e-05	0.000119733	yes
SOX13	SOX13	SOX13	chr1:204042245-204096871	Con	Knockdown	OK	3.51656	1.65108	-1.09075	-4.85273	5e-05	0.000119733	yes
FHOD3	FHOD3	FHOD3	chr18:33877658-34805288	Con	Knockdown	OK	11.4128	5.36418	-1.08922	-9.17367	5e-05	0.000119733	yes
SP2-AS1	SP2-AS1	SP2-AS1	chr17:45973515-46018770	Con	Knockdown	OK	2.5471	1.19726	-1.08911	-1.66079	0.00315	0.00594048	yes
ACSL1	ACSL1	ACSL1	chr4:185676748-185747268	Con	Knockdown	OK	14.5727	6.85242	-1.08858	-7.30123	5e-05	0.000119733	yes
SERPINB7	SERPINB7	SERPINB7	chr18:61420280-61472610	Con	Knockdown	OK	5.45665	2.57186	-1.0852	-2.85813	5e-05	0.000119733	yes
ZNF33A	ZNF33A	ZNF33A	chr10:38299577-38348995	Con	Knockdown	OK	6.8926	3.24871	-1.08518	-6.01408	5e-05	0.000119733	yes
CDC27	CDC27	CDC27	chr17:45195062-45266678	Con	Knockdown	OK	46.0638	21.7263	-1.08419	-14.7458	5e-05	0.000119733	yes
TYMSOS	TYMSOS	TYMSOS	chr18:596997-712662	Con	Knockdown	OK	2.74	1.29249	-1.08403	-1.41322	0.01645	0.0273608	yes
REXO2	REXO2	REXO2	chr11:114310107-114321000	Con	Knockdown	OK	70.0237	33.038	-1.08372	-9.67099	5e-05	0.000119733	yes
SYNC	SYNC	SYNC	chr1:33116748-33168361	Con	Knockdown	OK	30.6006	14.4414	-1.08335	-10.2065	5e-05	0.000119733	yes
CRTC3	CRTC3	CRTC3	chr15:91073117-91260371	Con	Knockdown	OK	5.81346	2.74358	-1.08334	-6.71922	5e-05	0.000119733	yes
NUDT6	NUDT6	NUDT6	chr4:123747862-123844159	Con	Knockdown	OK	11.3714	5.37085	-1.08219	-3.21719	5e-05	0.000119733	yes
MAP3K7	MAP3K7	MAP3K7	chr6:91223291-91297020	Con	Knockdown	OK	34.3544	16.2474	-1.08029	-12.0497	5e-05	0.000119733	yes
OR51B5	OR51B5	OR51B5	chr11:5362112-5526882	Con	Knockdown	OK	8.70173	4.11759	-1.0795	-2.30518	0.00075	0.00156838	yes
TMPO	TMPO	TMPO	chr12:98906750-98944157	Con	Knockdown	OK	97.8243	46.2968	-1.07928	-19.5003	5e-05	0.000119733	yes
ESRG	ESRG	ESRG	chr3:54156692-55108584	Con	Knockdown	OK	27.9343	13.228	-1.07844	-10.2881	5e-05	0.000119733	yes
DFFA	DFFA	DFFA	chr1:10520602-10532613	Con	Knockdown	OK	40.923	19.4144	-1.07579	-10.269	5e-05	0.000119733	yes
CRY1	CRY1	CRY1	chr12:107385142-107487635	Con	Knockdown	OK	17.0681	8.09801	-1.07567	-7.79853	5e-05	0.000119733	yes
PTGER2	PTGER2	PTGER2	chr14:52781015-52795322	Con	Knockdown	OK	3.98472	1.89139	-1.07503	-3.16586	5e-05	0.000119733	yes
ZFP90	ZFP90	ZFP90	chr16:68573115-68609975	Con	Knockdown	OK	12.7736	6.0637	-1.0749	-6.56118	5e-05	0.000119733	yes
CTNNB1	CTNNB1	CTNNB1	chr3:41240941-41281939	Con	Knockdown	OK	108.745	51.6219	-1.0749	-19.4028	5e-05	0.000119733	yes
AURKAIP1	AURKAIP1	AURKAIP1	chr1:1309109-1310818	Con	Knockdown	OK	109.214	51.8774	-1.07398	-11.3064	5e-05	0.000119733	yes
ELOVL4	ELOVL4	ELOVL4	chr6:80624528-80657315	Con	Knockdown	OK	3.05386	1.45251	-1.07208	-2.67715	5e-05	0.000119733	yes
PXDNL	PXDNL	PXDNL	chr8:52232136-52722005	Con	Knockdown	OK	2.59798	1.23708	-1.07045	-4.02638	5e-05	0.000119733	yes
PSMG1	PSMG1	PSMG1	chr21:40547371-40555440	Con	Knockdown	OK	60.0296	28.619	-1.0687	-8.33058	5e-05	0.000119733	yes
CDC45	CDC45	CDC45	chr22:19467348-19508135	Con	Knockdown	OK	29.5246	14.0761	-1.06868	-8.39976	5e-05	0.000119733	yes
NTPCR	NTPCR	NTPCR	chr1:233086369-233114219	Con	Knockdown	OK	18.6656	8.90536	-1.06764	-4.2459	5e-05	0.000119733	yes
B3GNT2	B3GNT2	B3GNT2	chr2:62423261-62451866	Con	Knockdown	OK	10.7808	5.14569	-1.06703	-5.32974	5e-05	0.000119733	yes
BYSL	BYSL	BYSL	chr6:41888964-41900784	Con	Knockdown	OK	15.477	7.38828	-1.06682	-6.61717	5e-05	0.000119733	yes
SMARCC1	SMARCC1	SMARCC1	chr3:47627377-47823405	Con	Knockdown	OK	45.1217	21.5413	-1.06671	-17.708	5e-05	0.000119733	yes
RNU86	RNU86	RNU86	chr22:39708886-39715670	Con	Knockdown	OK	1608.22	768.103	-1.06609	-0.386379	0.59425	0.655723	no
ZNF367	ZNF367	ZNF367	chr9:99148224-99180669	Con	Knockdown	OK	20.8672	9.98732	-1.06307	-8.79362	5e-05	0.000119733	yes
SMAD6	SMAD6	SMAD6	chr15:66994673-67074337	Con	Knockdown	OK	4.03276	1.93039	-1.06287	-3.79036	5e-05	0.000119733	yes
COL12A1	COL12A1	COL12A1	chr6:75794041-75915623	Con	Knockdown	OK	2.2207	1.06396	-1.06157	-4.73323	5e-05	0.000119733	yes
FGF2	FGF2	FGF2	chr4:123747862-123844159	Con	Knockdown	OK	11.745	5.62939	-1.061	-7.70597	5e-05	0.000119733	yes
ZNF141	ZNF141	ZNF141	chr4:331595-367691	Con	Knockdown	OK	4.15443	1.99202	-1.06042	-2.47024	0.00015	0.000342018	yes
ITGB1	ITGB1	ITGB1	chr10:33189245-33247293	Con	Knockdown	OK	768.725	368.686	-1.06007	-37.5696	5e-05	0.000119733	yes
BFSP1	BFSP1	BFSP1	chr20:17474549-17549865	Con	Knockdown	OK	12.7348	6.11478	-1.05841	-5.83048	5e-05	0.000119733	yes
SLC16A1	SLC16A1	SLC16A1	chr1:113454469-113498975	Con	Knockdown	OK	55.741	26.786	-1.05726	-13.6974	5e-05	0.000119733	yes
CASC9	CASC9	CASC9	chr8:76135351-76191124	Con	Knockdown	OK	4.33234	2.08306	-1.05644	-2.04857	0.0007	0.00146939	yes
AP2B1	AP2B1	AP2B1	chr17:33914281-34053436	Con	Knockdown	OK	101.803	49.0177	-1.0544	-24.1807	5e-05	0.000119733	yes
MFI2-AS1	MFI2-AS1	MFI2-AS1	chr3:196728611-196756687	Con	Knockdown	OK	5.5099	2.65713	-1.05216	-2.40307	0.00015	0.000342018	yes
DUT	DUT	DUT	chr15:48623620-48635570	Con	Knockdown	OK	72.2953	34.8931	-1.05096	-9.77425	5e-05	0.000119733	yes
IGFBP6	IGFBP6	IGFBP6	chr12:53491435-53496128	Con	Knockdown	OK	70.5205	34.0532	-1.05025	-9.87041	5e-05	0.000119733	yes
CHAF1B	CHAF1B	CHAF1B	chr21:37757688-37789125	Con	Knockdown	OK	20.9504	10.1263	-1.04886	-7.76504	5e-05	0.000119733	yes
SNX27	SNX27	SNX27	chr1:151584661-151671559	Con	Knockdown	OK	6.46553	3.12525	-1.0488	-7.1634	5e-05	0.000119733	yes
PTCD1	PTCD1	PTCD1	chr7:99006600-99063824	Con	Knockdown	OK	8.55632	4.14322	-1.04624	-0.757036	0.24005	0.303085	no
PGS1	PGS1	PGS1	chr17:76374698-76573476	Con	Knockdown	OK	12.0945	5.85777	-1.04592	-6.02479	5e-05	0.000119733	yes
ZNF414	ZNF414	ZNF414	chr19:8575461-8579048	Con	Knockdown	OK	4.19097	2.03109	-1.04503	-2.58499	5e-05	0.000119733	yes
PTCHD1	PTCHD1	PTCHD1	chrX:23352984-23414918	Con	Knockdown	OK	2.25623	1.0939	-1.04444	-3.52251	5e-05	0.000119733	yes
TSPYL4	TSPYL4	TSPYL4	chr6:116571130-116575261	Con	Knockdown	OK	12.3833	6.0039	-1.04442	-7.45002	5e-05	0.000119733	yes
MYLK-AS1	MYLK-AS1	MYLK-AS1	chr3:123304359-123603149	Con	Knockdown	OK	2.55338	1.23838	-1.04395	-1.091	0.02795	0.044501	yes
SETD7	SETD7	SETD7	chr4:140417088-140477923	Con	Knockdown	OK	21.2785	10.3215	-1.04374	-11.2568	5e-05	0.000119733	yes
LOC101930071	LOC101930071	LOC101930071	chr19:42901279-43156507	Con	Knockdown	OK	7.74909	3.75896	-1.04369	-0.940813	0.1326	0.180525	no
ZNF492	ZNF492	ZNF492	chr19:22817125-22850472	Con	Knockdown	OK	2.523	1.22407	-1.04345	-2.84049	5e-05	0.000119733	yes
ZDHHC14	ZDHHC14	ZDHHC14	chr6:157802556-158094977	Con	Knockdown	OK	5.45491	2.64817	-1.04256	-4.39998	5e-05	0.000119733	yes
GLYCTK	GLYCTK	GLYCTK	chr3:52321835-52329272	Con	Knockdown	OK	3.13259	1.52082	-1.04251	-2.12114	0.00015	0.000342018	yes
HEXIM2	HEXIM2	HEXIM2	chr17:43237540-43247407	Con	Knockdown	OK	2.18147	1.05908	-1.04249	-1.55921	0.00075	0.00156838	yes
DNAJC3	DNAJC3	DNAJC3	chr13:96329392-96447243	Con	Knockdown	OK	27.6199	13.4162	-1.04174	-11.3633	5e-05	0.000119733	yes
NOLC1	NOLC1	NOLC1	chr10:103911932-103923628	Con	Knockdown	OK	95.5062	46.4475	-1.03999	-21.6269	5e-05	0.000119733	yes
MVB12B	MVB12B	MVB12B	chr9:129089122-129269320	Con	Knockdown	OK	2.21916	1.08152	-1.03695	-3.50483	5e-05	0.000119733	yes
TUBB4A	TUBB4A	TUBB4A	chr19:6494329-6502859	Con	Knockdown	OK	3.05578	1.49064	-1.0356	-2.85726	5e-05	0.000119733	yes
CYCS	CYCS	CYCS	chr7:25158269-25164980	Con	Knockdown	OK	46.2388	22.5779	-1.03419	-14.7502	5e-05	0.000119733	yes
AK4	AK4	AK4	chr1:65613231-65697828	Con	Knockdown	OK	54.7713	26.7473	-1.03403	-18.1191	5e-05	0.000119733	yes
ADPGK	ADPGK	ADPGK	chr15:73043707-73090540	Con	Knockdown	OK	11.8172	5.77555	-1.03285	-5.61274	5e-05	0.000119733	yes
PCID2	PCID2	PCID2	chr13:113831852-113919392	Con	Knockdown	OK	43.5457	21.2907	-1.03231	-5.39159	5e-05	0.000119733	yes
RPL13AP20	RPL13AP20	RPL13AP20	chr12:13028410-13029070	Con	Knockdown	OK	2.67338	1.30722	-1.03216	-1.20516	0.0431	0.0662632	no
TSEN15	TSEN15	TSEN15	chr1:184020784-184043344	Con	Knockdown	OK	25.1651	12.3205	-1.03036	-6.13362	5e-05	0.000119733	yes
TREX1	TREX1	TREX1	chr3:48488113-48509044	Con	Knockdown	OK	2.69059	1.31817	-1.02938	-1.49285	0.01055	0.01819	yes
MCM5	MCM5	MCM5	chr22:35796115-35820495	Con	Knockdown	OK	74.5527	36.5441	-1.02862	-15.9331	5e-05	0.000119733	yes
CAV1	CAV1	CAV1	chr7:116164838-116201239	Con	Knockdown	OK	249.647	122.496	-1.02715	-20.6271	5e-05	0.000119733	yes
RSRC1	RSRC1	RSRC1	chr3:157827840-158262624	Con	Knockdown	OK	34.2604	16.8219	-1.0262	-8.06697	5e-05	0.000119733	yes
EEF2K	EEF2K	EEF2K	chr16:22217591-22300066	Con	Knockdown	OK	4.86097	2.38981	-1.02435	-6.53925	5e-05	0.000119733	yes
CHSY1	CHSY1	CHSY1	chr15:101715927-101792137	Con	Knockdown	OK	8.25642	4.05979	-1.02411	-6.38013	5e-05	0.000119733	yes
CAT	CAT	CAT	chr11:34460471-34493607	Con	Knockdown	OK	21.7688	10.7057	-1.02389	-6.94494	5e-05	0.000119733	yes
PCDH9	PCDH9	PCDH9	chr13:66876965-67804468	Con	Knockdown	OK	2.13283	1.04904	-1.0237	-3.45216	5e-05	0.000119733	yes
PLS1	PLS1	PLS1	chr3:142315228-142432505	Con	Knockdown	OK	23.6783	11.6473	-1.02357	-7.70414	5e-05	0.000119733	yes
ECT2	ECT2	ECT2	chr3:172468474-172539264	Con	Knockdown	OK	88.0384	43.3073	-1.02352	-16.5532	5e-05	0.000119733	yes
ERCC4	ERCC4	ERCC4	chr16:14014013-14046205	Con	Knockdown	OK	3.04476	1.49805	-1.02324	-4.12958	5e-05	0.000119733	yes
EIF4EBP2	EIF4EBP2	EIF4EBP2	chr10:72163860-72188374	Con	Knockdown	OK	30.5974	15.0573	-1.02294	-14.7368	5e-05	0.000119733	yes
CMTM1	CMTM1	CMTM1	chr16:66586465-66613038	Con	Knockdown	OK	6.96157	3.42864	-1.02178	-1.7516	0.00025	0.000555699	yes
SNHG16	SNHG16	SNHG16	chr17:74553845-74561430	Con	Knockdown	OK	38.342	18.8887	-1.02141	-8.80773	5e-05	0.000119733	yes
LINC00702	LINC00702	LINC00702	chr10:4249067-4286104	Con	Knockdown	OK	5.61936	2.77065	-1.02018	-1.34289	0.01855	0.0305336	yes
TRAF3IP2-AS1	TRAF3IP2-AS1	TRAF3IP2-AS1	chr6:111620233-111927477	Con	Knockdown	OK	3.9114	1.92877	-1.02001	-1.76316	0.00435	0.00801815	yes
PUSL1	PUSL1	PUSL1	chr1:1243993-1260067	Con	Knockdown	OK	14.4735	7.14285	-1.01884	-3.97907	5e-05	0.000119733	yes
TMEM189	TMEM189	TMEM189	chr20:48697660-48770335	Con	Knockdown	OK	13.771	6.79792	-1.01847	-5.74955	5e-05	0.000119733	yes
CBWD2	CBWD2	CBWD2	chr2:114195267-114253781	Con	Knockdown	OK	5.3246	2.62951	-1.01788	-2.94283	5e-05	0.000119733	yes
QTRT1	QTRT1	QTRT1	chr19:10812111-10824043	Con	Knockdown	OK	13.3061	6.57667	-1.01666	-4.70643	5e-05	0.000119733	yes
PPP1CC	PPP1CC	PPP1CC	chr12:111157612-111180783	Con	Knockdown	OK	154.95	76.6048	-1.01629	-17.3712	5e-05	0.000119733	yes
EBLN3	EBLN3	EBLN3	chr9:37079892-37090398	Con	Knockdown	OK	33.9017	16.7616	-1.0162	-10.8017	5e-05	0.000119733	yes
PTBP3	PTBP3	PTBP3	chr9:114758831-115112545	Con	Knockdown	OK	38.7546	19.162	-1.01612	-13.2532	5e-05	0.000119733	yes
TONSL	TONSL	TONSL	chr8:145654162-145669812	Con	Knockdown	OK	16.6966	8.25992	-1.01535	-10.9181	5e-05	0.000119733	yes
MRPL38	MRPL38	MRPL38	chr17:73894723-73901181	Con	Knockdown	OK	32.2006	15.9334	-1.01504	-8.28379	5e-05	0.000119733	yes
ME2	ME2	ME2	chr18:48405431-48476162	Con	Knockdown	OK	40.6375	20.1229	-1.01397	-12.6543	5e-05	0.000119733	yes
TRIM16L	TRIM16L	TRIM16L	chr17:18625401-18639431	Con	Knockdown	OK	5.54608	2.74777	-1.01321	-3.59879	5e-05	0.000119733	yes
RGS19	RGS19	RGS19	chr20:62704534-62711324	Con	Knockdown	OK	22.4842	11.1431	-1.01276	-6.98278	5e-05	0.000119733	yes
GMCL1	GMCL1	GMCL1	chr2:70056817-70106727	Con	Knockdown	OK	13.8591	6.8808	-1.01019	-5.32302	5e-05	0.000119733	yes
FAM231D	FAM231D	FAM231D	chr1:149287129-149291743	Con	Knockdown	OK	2.0567	1.02166	-1.00942	-0.849927	0.11905	0.164318	no
SNHG9	SNHG9	SNHG9	chr16:2014996-2015505	Con	Knockdown	OK	36.8941	18.3334	-1.00891	-1.65889	0.01025	0.0177203	yes
STEAP3	STEAP3	STEAP3	chr2:119981383-120023227	Con	Knockdown	OK	17.6656	8.77875	-1.00885	-9.41727	5e-05	0.000119733	yes
IL18	IL18	IL18	chr11:112013973-112034840	Con	Knockdown	OK	37.2885	18.5733	-1.0055	-5.4512	5e-05	0.000119733	yes
PHLDA1	PHLDA1	PHLDA1	chr12:76419226-76425556	Con	Knockdown	OK	63.8956	31.8473	-1.00455	-18.1745	5e-05	0.000119733	yes
TMEM11	TMEM11	TMEM11	chr17:21101262-21117908	Con	Knockdown	OK	19.7809	9.87762	-1.00187	-5.94144	5e-05	0.000119733	yes
NAT6	NAT6	NAT6	chr3:50330258-50336899	Con	Knockdown	OK	7.18832	3.59385	-1.00012	-2.95327	5e-05	0.000119733	yes
TIMM23B	TIMM23B	TIMM23B	chr10:51371378-51734610	Con	Knockdown	OK	2.53247	5.07041	1.00156	2.01804	0.00215	0.00415889	yes
STK40	STK40	STK40	chr1:36805219-36851528	Con	Knockdown	OK	33.1528	66.3811	1.00164	17.8825	5e-05	0.000119733	yes
OSCP1	OSCP1	OSCP1	chr1:36883506-36916086	Con	Knockdown	OK	2.16201	4.33467	1.00355	1.90164	0.00145	0.00288283	yes
NPIPB3	NPIPB3	NPIPB3	chr16:21413454-21436658	Con	Knockdown	OK	1.01268	2.03317	1.00556	3.08463	5e-05	0.000119733	yes
UBE2D4	UBE2D4	UBE2D4	chr7:43966034-44058793	Con	Knockdown	OK	4.08444	8.20587	1.00652	5.8229	5e-05	0.000119733	yes
GDPD1	GDPD1	GDPD1	chr17:57297827-57353330	Con	Knockdown	OK	1.96484	3.95327	1.00864	1.90606	0.001	0.00204647	yes
NECAP1	NECAP1	NECAP1	chr12:8234806-8250373	Con	Knockdown	OK	17.785	35.8186	1.01005	9.40558	5e-05	0.000119733	yes
RNF44	RNF44	RNF44	chr5:175953699-175964421	Con	Knockdown	OK	15.9765	32.2004	1.01113	14.0101	5e-05	0.000119733	yes
RNFT1	RNFT1	RNFT1	chr17:58029722-58042117	Con	Knockdown	OK	8.40365	16.9714	1.01402	4.95537	5e-05	0.000119733	yes
TRIM38	TRIM38	TRIM38	chr6:25962916-25987557	Con	Knockdown	OK	5.01357	10.1289	1.01457	7.60345	5e-05	0.000119733	yes
EFR3A	EFR3A	EFR3A	chr8:132916355-133025886	Con	Knockdown	OK	45.7914	92.6716	1.01705	19.4476	5e-05	0.000119733	yes
SLC35G1	SLC35G1	SLC35G1	chr10:95653729-95662491	Con	Knockdown	OK	7.21083	14.5968	1.01741	4.8108	5e-05	0.000119733	yes
TECPR2	TECPR2	TECPR2	chr14:102829299-102968818	Con	Knockdown	OK	4.14913	8.40011	1.0176	6.82006	5e-05	0.000119733	yes
CD164	CD164	CD164	chr6:109687716-109703762	Con	Knockdown	OK	134.272	271.848	1.01764	23.5634	5e-05	0.000119733	yes
VGLL4	VGLL4	VGLL4	chr3:11314009-11762242	Con	Knockdown	OK	16.2698	32.9791	1.01935	9.87302	5e-05	0.000119733	yes
GLCE	GLCE	GLCE	chr15:69116302-69564544	Con	Knockdown	OK	11.7321	23.7846	1.01957	9.84183	5e-05	0.000119733	yes
GATSL3	GATSL3	GATSL3	chr22:30681106-30685616	Con	Knockdown	OK	2.22074	4.5057	1.02071	3.13689	5e-05	0.000119733	yes
TSC1	TSC1	TSC1	chr9:135766734-135820020	Con	Knockdown	OK	6.25896	12.7136	1.02238	11.5972	5e-05	0.000119733	yes
SNORA80E	SNORA80E	SNORA80E	chr1:155882833-155904233	Con	Knockdown	NOTEST	4.85488	9.86188	1.02243	0	1	1	no
CBLB	CBLB	CBLB	chr3:105377108-105587887	Con	Knockdown	OK	1.1866	2.42092	1.02871	3.33442	5e-05	0.000119733	yes
ATXN1	ATXN1	ATXN1	chr6:16299342-16761721	Con	Knockdown	OK	3.56137	7.26748	1.02902	9.18731	5e-05	0.000119733	yes
ABHD3	ABHD3	ABHD3	chr18:19230857-19284766	Con	Knockdown	OK	6.69535	13.6942	1.03233	4.04708	5e-05	0.000119733	yes
IL1RAP	IL1RAP	IL1RAP	chr3:190231839-190374986	Con	Knockdown	OK	6.45469	13.2174	1.03401	4.63217	5e-05	0.000119733	yes
PPP3CB	PPP3CB	PPP3CB	chr10:75196185-75335433	Con	Knockdown	OK	26.6815	54.7526	1.03709	9.23071	5e-05	0.000119733	yes
TVP23B	TVP23B	TVP23B	chr17:18684581-18710026	Con	Knockdown	OK	10.3577	21.2711	1.03819	4.95127	5e-05	0.000119733	yes
GALNT7	GALNT7	GALNT7	chr4:174089903-174245118	Con	Knockdown	OK	12.0467	24.7456	1.03854	9.48203	5e-05	0.000119733	yes
CAB39L	CAB39L	CAB39L	chr13:49882785-50018262	Con	Knockdown	OK	5.33623	10.9793	1.04089	5.84727	5e-05	0.000119733	yes
ZCCHC3	ZCCHC3	ZCCHC3	chr20:278203-280963	Con	Knockdown	OK	15.5541	32.0542	1.04322	10.3626	5e-05	0.000119733	yes
FAM214B	FAM214B	FAM214B	chr9:35104117-35115893	Con	Knockdown	OK	7.7855	16.0512	1.04382	8.49504	5e-05	0.000119733	yes
ZSWIM4	ZSWIM4	ZSWIM4	chr19:13906273-13943044	Con	Knockdown	OK	6.7355	13.8882	1.044	9.27708	5e-05	0.000119733	yes
SLC8B1	SLC8B1	SLC8B1	chr12:113736570-113772925	Con	Knockdown	OK	1.84644	3.81588	1.04727	3.99905	5e-05	0.000119733	yes
GREB1L	GREB1L	GREB1L	chr18:18822202-19102791	Con	Knockdown	OK	1.29101	2.67207	1.04946	4.54269	5e-05	0.000119733	yes
KIAA0895	KIAA0895	KIAA0895	chr7:36363758-36493401	Con	Knockdown	OK	3.3687	7.00352	1.05589	3.15405	5e-05	0.000119733	yes
PELI1	PELI1	PELI1	chr2:64319785-64371605	Con	Knockdown	OK	3.7382	7.78754	1.05882	5.09851	5e-05	0.000119733	yes
CROT	CROT	CROT	chr7:86974950-87029112	Con	Knockdown	OK	5.20658	10.8676	1.06163	4.10214	5e-05	0.000119733	yes
SNORD15B	SNORD15B	SNORD15B	chr11:75110534-75133345	Con	Knockdown	OK	3.52463	7.36361	1.06294	1.12909	0.5447	0.610475	no
PHLPP2	PHLPP2	PHLPP2	chr16:71678828-71758604	Con	Knockdown	OK	7.07841	14.7995	1.06406	11.4819	5e-05	0.000119733	yes
EFCAB14	EFCAB14	EFCAB14	chr1:47139707-47184736	Con	Knockdown	OK	25.2987	52.9078	1.06442	17.6075	5e-05	0.000119733	yes
ZBTB39	ZBTB39	ZBTB39	chr12:57392616-57400297	Con	Knockdown	OK	3.51747	7.36383	1.06592	7.64314	5e-05	0.000119733	yes
TGFBR2	TGFBR2	TGFBR2	chr3:30647993-30735633	Con	Knockdown	OK	30.0562	62.9626	1.06683	18.4092	5e-05	0.000119733	yes
ZSWIM6	ZSWIM6	ZSWIM6	chr5:60628099-60841999	Con	Knockdown	OK	5.01761	10.5136	1.06718	7.87914	5e-05	0.000119733	yes
CHRNE	CHRNE	CHRNE	chr17:4736634-4806369	Con	Knockdown	OK	2.429	5.102	1.0707	3.26303	5e-05	0.000119733	yes
HOXA1	HOXA1	HOXA1	chr7:27132613-27135625	Con	Knockdown	OK	1.80796	3.80262	1.07263	2.99162	5e-05	0.000119733	yes
BCL7A	BCL7A	BCL7A	chr12:122459791-122499950	Con	Knockdown	OK	6.58577	13.8764	1.07521	8.48487	5e-05	0.000119733	yes
SMPD1	SMPD1	SMPD1	chr11:6411643-6416228	Con	Knockdown	OK	4.80409	10.1667	1.08152	5.93121	5e-05	0.000119733	yes
MIR3916	MIR3916	MIR3916	chr1:247365268-247365362	Con	Knockdown	OK	20.7717	43.9781	1.08216	6.39873	0.43925	0.509344	no
NRBP1	NRBP1	NRBP1	chr2:27651472-27665124	Con	Knockdown	OK	40.9796	87.0748	1.08735	16.4314	5e-05	0.000119733	yes
RALGAPA1	RALGAPA1	RALGAPA1	chr14:36007557-36278432	Con	Knockdown	OK	8.16559	17.3774	1.08959	10.5412	5e-05	0.000119733	yes
TNFRSF6B	TNFRSF6B	TNFRSF6B	chr20:62289162-62370460	Con	Knockdown	OK	1.02622	2.19215	1.09501	0.578811	0.27555	0.341467	no
ANKS1B	ANKS1B	ANKS1B	chr12:99039077-100378432	Con	Knockdown	OK	1.22038	2.61045	1.09697	1.67508	0.00165	0.00324923	yes
CSRNP1	CSRNP1	CSRNP1	chr3:39183341-39195102	Con	Knockdown	OK	2.94333	6.30222	1.09841	5.45296	5e-05	0.000119733	yes
HBP1	HBP1	HBP1	chr7:106809405-107218968	Con	Knockdown	OK	11.5892	24.8246	1.09899	6.00494	5e-05	0.000119733	yes
FAM160B1	FAM160B1	FAM160B1	chr10:116581502-116659586	Con	Knockdown	OK	5.9017	12.6981	1.1054	7.98	5e-05	0.000119733	yes
LMF1	LMF1	LMF1	chr16:903634-1031318	Con	Knockdown	OK	1.58969	3.42088	1.10562	3.60715	5e-05	0.000119733	yes
TMC7	TMC7	TMC7	chr16:18995255-19091417	Con	Knockdown	OK	1.97853	4.27047	1.10997	3.83737	5e-05	0.000119733	yes
PDCD4	PDCD4	PDCD4	chr10:112631552-112679124	Con	Knockdown	OK	13.0192	28.1181	1.11086	9.03727	5e-05	0.000119733	yes
VGF	VGF	VGF	chr7:100805789-100808852	Con	Knockdown	OK	46.5747	100.872	1.11491	20.9437	5e-05	0.000119733	yes
TBC1D7	TBC1D7	TBC1D7	chr6:13305183-13328815	Con	Knockdown	OK	9.35772	20.2915	1.11665	4.62471	5e-05	0.000119733	yes
ARRDC3	ARRDC3	ARRDC3	chr5:90664540-90716532	Con	Knockdown	OK	22.2709	48.3886	1.11951	13.1118	5e-05	0.000119733	yes
ITGA5	ITGA5	ITGA5	chr12:54747474-54867386	Con	Knockdown	OK	29.1908	63.536	1.12206	20.3043	5e-05	0.000119733	yes
UBN2	UBN2	UBN2	chr7:138916230-138992982	Con	Knockdown	OK	2.44867	5.34454	1.12606	8.79622	5e-05	0.000119733	yes
MMP15	MMP15	MMP15	chr16:58059281-58080804	Con	Knockdown	OK	1.64592	3.59729	1.12802	4.98307	5e-05	0.000119733	yes
LOC100507291	LOC100507291	LOC100507291	chr3:139108644-139396885	Con	Knockdown	OK	2.15756	4.72311	1.13033	1.69284	0.0046	0.00843467	yes
PGM2L1	PGM2L1	PGM2L1	chr11:74041356-74109510	Con	Knockdown	OK	1.84522	4.04106	1.13094	5.62871	5e-05	0.000119733	yes
SGK1	SGK1	SGK1	chr6:134490383-134639196	Con	Knockdown	OK	2.40025	5.25791	1.13131	3.32949	5e-05	0.000119733	yes
TAS2R20	TAS2R20	TAS2R20	chr12:10998447-11328619	Con	Knockdown	OK	1.20999	2.65328	1.13278	1.79179	0.0037	0.0068891	yes
SNORA20	SNORA20	SNORA20	chr6:160181290-160210735	Con	Knockdown	OK	17.6136	38.78	1.13862	0.776397	0.4289	0.49899	no
NR6A1	NR6A1	NR6A1	chr9:127279553-127533589	Con	Knockdown	OK	1.47562	3.24902	1.13868	5.46173	5e-05	0.000119733	yes
RHOB	RHOB	RHOB	chr2:20646831-20649204	Con	Knockdown	OK	12.1068	26.7353	1.14293	9.32641	5e-05	0.000119733	yes
DOCK4	DOCK4	DOCK4	chr7:111366163-111846462	Con	Knockdown	OK	9.85894	21.83	1.14681	14.438	5e-05	0.000119733	yes
SNORA4	SNORA4	SNORA4	chr3:186501360-186524484	Con	Knockdown	OK	36.9082	81.7537	1.14734	0.786444	0.24385	0.307413	no
SPRY4	SPRY4	SPRY4	chr5:141689991-141704620	Con	Knockdown	OK	6.86835	15.2212	1.14805	10.5975	5e-05	0.000119733	yes
CCNJ	CCNJ	CCNJ	chr10:97471535-97849992	Con	Knockdown	OK	5.6321	12.5554	1.15656	4.24664	5e-05	0.000119733	yes
SNORA52	SNORA52	SNORA52	chr11:809935-812876	Con	Knockdown	OK	12.7665	28.5297	1.1601	2.19657	0.4393	0.509351	no
FOXO4	FOXO4	FOXO4	chrX:70315998-70323384	Con	Knockdown	OK	1.19335	2.67042	1.16205	3.72606	5e-05	0.000119733	yes
PARP11	PARP11	PARP11	chr12:3918026-3982614	Con	Knockdown	OK	1.77133	3.98551	1.16993	4.228	5e-05	0.000119733	yes
ZDHHC12	ZDHHC12	ZDHHC12	chr9:131464801-131486408	Con	Knockdown	OK	9.57037	21.6313	1.17647	5.75432	5e-05	0.000119733	yes
DDIT3	DDIT3	DDIT3	chr12:57881735-57914300	Con	Knockdown	OK	18.1536	41.0553	1.17731	6.96295	5e-05	0.000119733	yes
SNX16	SNX16	SNX16	chr8:82711817-82754521	Con	Knockdown	OK	7.21985	16.3537	1.17957	6.13532	5e-05	0.000119733	yes
SNORA40	SNORA40	SNORA40	chr11:93468275-93468402	Con	Knockdown	OK	98.0198	222.123	1.18021	1.00913	0.06725	0.0985273	no
FNIP2	FNIP2	FNIP2	chr4:159690181-159956333	Con	Knockdown	OK	4.46539	10.1217	1.18059	8.67872	5e-05	0.000119733	yes
DCUN1D3	DCUN1D3	DCUN1D3	chr16:20869395-20936331	Con	Knockdown	OK	2.0097	4.56895	1.18489	3.13997	5e-05	0.000119733	yes
HIPK3	HIPK3	HIPK3	chr11:33278217-33378568	Con	Knockdown	OK	10.0305	22.8463	1.18757	12.2936	5e-05	0.000119733	yes
SNORA1	SNORA1	SNORA1	chr11:93465169-93465299	Con	Knockdown	OK	15.8312	36.1934	1.19296	0.656859	0.3823	0.453614	no
MLLT10P1	MLLT10P1	MLLT10P1	chr20:29637583-29638138	Con	Knockdown	OK	1.27933	2.92807	1.19456	0.855347	0.12155	0.16729	no
C7orf43	C7orf43	C7orf43	chr7:99752042-99756344	Con	Knockdown	OK	4.39927	10.082	1.19645	6.38154	5e-05	0.000119733	yes
CLDN12	CLDN12	CLDN12	chr7:90032647-90045268	Con	Knockdown	OK	17.7825	40.7626	1.19679	11.751	5e-05	0.000119733	yes
ZBTB34	ZBTB34	ZBTB34	chr9:129622943-129648156	Con	Knockdown	OK	1.25949	2.88923	1.19784	4.66116	5e-05	0.000119733	yes
DOT1L	DOT1L	DOT1L	chr19:2164147-2236352	Con	Knockdown	OK	9.2126	21.1388	1.19822	14.2672	5e-05	0.000119733	yes
HIST1H2AG	HIST1H2AG	HIST1H2AG	chr6:27100816-27101314	Con	Knockdown	OK	2.67961	6.16899	1.20301	1.95263	0.0064	0.0114488	yes
HIC2	HIC2	HIC2	chr22:21771692-21805750	Con	Knockdown	OK	1.38669	3.20083	1.2068	6.23708	5e-05	0.000119733	yes
FBXO36	FBXO36	FBXO36	chr2:230787206-230877825	Con	Knockdown	OK	1.12018	2.5872	1.20766	3.01504	5e-05	0.000119733	yes
DICER1	DICER1	DICER1	chr14:95552564-95646270	Con	Knockdown	OK	15.0917	34.9579	1.21187	19.1721	5e-05	0.000119733	yes
PPP2R1B	PPP2R1B	PPP2R1B	chr11:111473114-111637169	Con	Knockdown	OK	18.0954	41.9799	1.21407	10.1073	5e-05	0.000119733	yes
TMEM87B	TMEM87B	TMEM87B	chr2:112812799-112876895	Con	Knockdown	OK	6.29196	14.6308	1.21742	8.6463	5e-05	0.000119733	yes
MICB	MICB	MICB	chr6_ssto_hap7:2793462-2809708	Con	Knockdown	OK	9.37702	21.8301	1.21912	9.04398	5e-05	0.000119733	yes
SLC31A2	SLC31A2	SLC31A2	chr9:115913237-115926422	Con	Knockdown	OK	2.73282	6.364	1.21955	3.83973	5e-05	0.000119733	yes
ATP5J2-PTCD1	ATP5J2-PTCD1	ATP5J2-PTCD1	chr7:99006600-99063824	Con	Knockdown	OK	3.36159	7.8413	1.22195	0.98718	0.1467	0.197861	no
RNF38	RNF38	RNF38	chr9:36336398-36401195	Con	Knockdown	OK	12.8774	30.0984	1.22484	11.4758	5e-05	0.000119733	yes
SNX11	SNX11	SNX11	chr17:46184919-46200105	Con	Knockdown	OK	5.10502	11.9493	1.22693	6.61447	5e-05	0.000119733	yes
SLC35D2	SLC35D2	SLC35D2	chr9:99075718-99145992	Con	Knockdown	OK	10.1626	23.8086	1.2282	7.11012	5e-05	0.000119733	yes
DNAJB9	DNAJB9	DNAJB9	chr7:108202587-108215294	Con	Knockdown	OK	7.20375	16.8972	1.22996	5.27154	5e-05	0.000119733	yes
HGSNAT	HGSNAT	HGSNAT	chr8:42995591-43057970	Con	Knockdown	OK	7.12995	16.747	1.23194	11.0657	5e-05	0.000119733	yes
SESN1	SESN1	SESN1	chr6:109307639-109415708	Con	Knockdown	OK	3.77356	8.8767	1.2341	4.8968	5e-05	0.000119733	yes
TNFRSF10D	TNFRSF10D	TNFRSF10D	chr8:22993100-23021543	Con	Knockdown	OK	11.0268	26.0488	1.2402	11.2819	5e-05	0.000119733	yes
SNORD83A	SNORD83A	SNORD83A	chr22:39708886-39715670	Con	Knockdown	OK	47.8662	113.081	1.24027	0.625486	0.607	0.66751	no
RSG1	RSG1	RSG1	chr1:16558181-16563659	Con	Knockdown	OK	1.42711	3.37948	1.24371	3.08716	5e-05	0.000119733	yes
ATXN1L	ATXN1L	ATXN1L	chr16:71879893-71891236	Con	Knockdown	OK	7.88315	18.7247	1.2481	15.5264	5e-05	0.000119733	yes
C7orf60	C7orf60	C7orf60	chr7:112459201-112579932	Con	Knockdown	OK	6.64852	15.7932	1.2482	7.724	5e-05	0.000119733	yes
SYNJ2BP-COX16	SYNJ2BP-COX16	SYNJ2BP-COX16	chr14:70791797-70883807	Con	Knockdown	OK	1.20997	2.88284	1.25252	0.69029	0.2675	0.333167	no
SOCS1	SOCS1	SOCS1	chr16:11348273-11350039	Con	Knockdown	OK	1.95486	4.67802	1.25883	2.87806	5e-05	0.000119733	yes
GABARAPL1	GABARAPL1	GABARAPL1	chr12:10365488-10375724	Con	Knockdown	OK	5.32326	12.7727	1.26268	6.12601	5e-05	0.000119733	yes
SYP	SYP	SYP	chrX:49044264-49058913	Con	Knockdown	OK	2.90549	7.01775	1.27223	5.7637	5e-05	0.000119733	yes
ENDOV	ENDOV	ENDOV	chr17:78234659-78411884	Con	Knockdown	OK	1.21533	2.93695	1.27297	2.24655	0.00155	0.0030669	yes
IL6R	IL6R	IL6R	chr1:154377668-154441926	Con	Knockdown	OK	1.13987	2.77206	1.28209	3.9597	5e-05	0.000119733	yes
SCARNA27	SCARNA27	SCARNA27	chr6:7727010-8102828	Con	Knockdown	OK	9.63212	23.4461	1.28342	3.53904	0.48705	0.55669	no
HIST1H2BD	HIST1H2BD	HIST1H2BD	chr6:26158348-26171576	Con	Knockdown	OK	16.9063	41.2798	1.28788	5.11004	5e-05	0.000119733	yes
RIC1	RIC1	RIC1	chr9:5629118-5776556	Con	Knockdown	OK	9.42689	23.0546	1.2902	12.5488	5e-05	0.000119733	yes
SYCP3	SYCP3	SYCP3	chr12:102091416-102133250	Con	Knockdown	OK	1.11712	2.73281	1.2906	1.54769	0.00985	0.0170823	yes
HNRNPH2	HNRNPH2	HNRNPH2	chrX:100645877-100669128	Con	Knockdown	OK	6.67121	16.4271	1.30006	3.07606	5e-05	0.000119733	yes
SLC16A6	SLC16A6	SLC16A6	chr17:66255322-66597095	Con	Knockdown	OK	1.12413	2.77592	1.30416	3.21431	5e-05	0.000119733	yes
CRELD1	CRELD1	CRELD1	chr3:9975523-9987097	Con	Knockdown	OK	3.61774	9.1954	1.34582	5.92048	5e-05	0.000119733	yes
POLR2A	POLR2A	POLR2A	chr17:7387697-7417935	Con	Knockdown	OK	31.4925	80.3028	1.35044	32.3946	5e-05	0.000119733	yes
TDG	TDG	TDG	chr12:104359592-104382656	Con	Knockdown	OK	9.31544	23.7677	1.35131	9.87713	5e-05	0.000119733	yes
TK2	TK2	TK2	chr16:66541905-66584315	Con	Knockdown	OK	2.88149	7.36219	1.35332	7.54625	5e-05	0.000119733	yes
KLHL28	KLHL28	KLHL28	chr14:45393512-45431179	Con	Knockdown	OK	4.55339	11.6355	1.35352	8.33692	5e-05	0.000119733	yes
HIST1H2AC	HIST1H2AC	HIST1H2AC	chr6:26124372-26124918	Con	Knockdown	OK	6.80835	17.5209	1.3637	3.45298	5e-05	0.000119733	yes
FAM43A	FAM43A	FAM43A	chr3:194406621-194409766	Con	Knockdown	OK	3.03894	7.83122	1.36567	6.75487	5e-05	0.000119733	yes
FOS	FOS	FOS	chr14:75745480-75748937	Con	Knockdown	OK	1.55221	4.05656	1.38593	3.98451	5e-05	0.000119733	yes
SLC41A3	SLC41A3	SLC41A3	chr3:125725199-125820391	Con	Knockdown	OK	11.4007	29.8144	1.38689	9.91977	5e-05	0.000119733	yes
MCTP1	MCTP1	MCTP1	chr5:94041241-94620279	Con	Knockdown	OK	9.38188	24.5778	1.38941	11.4789	5e-05	0.000119733	yes
IGIP	IGIP	IGIP	chr5:139505520-139508391	Con	Knockdown	OK	2.72675	7.17192	1.39518	4.6207	5e-05	0.000119733	yes
MIR2682	MIR2682	MIR2682	chr1:98453555-98515249	Con	Knockdown	OK	10.9039	29.0118	1.4118	0.596803	0.55975	0.624683	no
GPR3	GPR3	GPR3	chr1:27719147-27722317	Con	Knockdown	OK	2.31183	6.19684	1.4225	4.8243	5e-05	0.000119733	yes
CNEP1R1	CNEP1R1	CNEP1R1	chr16:50059116-50070999	Con	Knockdown	OK	13.4344	36.0498	1.42405	9.01539	5e-05	0.000119733	yes
SNORD49A	SNORD49A	SNORD49A	chr17:16342300-16395505	Con	Knockdown	OK	145.403	392.562	1.43286	32.6066	0.4315	0.501512	no
KBTBD8	KBTBD8	KBTBD8	chr3:67048726-67061632	Con	Knockdown	OK	1.62673	4.42424	1.44345	4.894	5e-05	0.000119733	yes
SNORA51	SNORA51	SNORA51	chr20:2633177-2639039	Con	Knockdown	OK	15.9972	43.5575	1.4451	4.69869	0.48515	0.554792	no
HIST1H2BJ	HIST1H2BJ	HIST1H2BJ	chr6:27100094-27100575	Con	Knockdown	OK	2.29148	6.25808	1.44944	1.62004	0.02285	0.0370067	yes
CPEB3	CPEB3	CPEB3	chr10:93808396-94050875	Con	Knockdown	OK	1.06245	2.91933	1.45824	4.3206	5e-05	0.000119733	yes
TERC	TERC	TERC	chr3:169482397-169482848	Con	Knockdown	OK	2.22857	6.29914	1.49903	1.81314	0.01055	0.01819	yes
SCARNA9	SCARNA9	SCARNA9	chr11:93394815-93463522	Con	Knockdown	OK	2.47256	7.01448	1.50433	0.895954	0.12305	0.169053	no
SNORA8	SNORA8	SNORA8	chr11:93465526-93465665	Con	Knockdown	OK	39.6499	113.1	1.51222	1.08776	0.0745	0.107934	no
CREBRF	CREBRF	CREBRF	chr5:172483354-172566291	Con	Knockdown	OK	2.70951	7.80561	1.52648	8.08241	5e-05	0.000119733	yes
C2CD2	C2CD2	C2CD2	chr21:43305218-43373999	Con	Knockdown	OK	16.2598	46.9743	1.53057	23.7051	5e-05	0.000119733	yes
C18orf32	C18orf32	C18orf32	chr18:47007547-47018935	Con	Knockdown	OK	1.38705	4.02068	1.53542	0.985311	0.15925	0.212437	no
RHEBL1	RHEBL1	RHEBL1	chr12:49458458-49463808	Con	Knockdown	OK	1.76973	5.1449	1.53961	2.83135	5e-05	0.000119733	yes
ANKRD52	ANKRD52	ANKRD52	chr12:56623819-56652143	Con	Knockdown	OK	16.1918	47.1416	1.54173	30.077	5e-05	0.000119733	yes
SNORA62	SNORA62	SNORA62	chr3:39448179-39454032	Con	Knockdown	OK	8.2125	24.133	1.55511	3.57074	0.37955	0.450767	no
KHNYN	KHNYN	KHNYN	chr14:24895739-24912111	Con	Knockdown	OK	5.87761	17.2735	1.55526	15.8819	5e-05	0.000119733	yes
TET3	TET3	TET3	chr2:74213530-74335302	Con	Knockdown	OK	2.45322	7.22247	1.55782	13.4572	5e-05	0.000119733	yes
CDC37L1-AS1	CDC37L1-AS1	CDC37L1-AS1	chr9:4676600-4679480	Con	Knockdown	OK	1.86204	5.53235	1.57101	0.989436	0.30595	0.374571	no
SNORA81	SNORA81	SNORA81	chr3:186501360-186524484	Con	Knockdown	OK	8.06535	24.0487	1.57615	0.976876	0.32715	0.397168	no
MXD1	MXD1	MXD1	chr2:70142172-70170076	Con	Knockdown	OK	1.53445	4.59902	1.58361	6.29733	5e-05	0.000119733	yes
HIST1H2BK	HIST1H2BK	HIST1H2BK	chr6:27106071-27114637	Con	Knockdown	OK	19.3741	58.3159	1.58976	9.50838	5e-05	0.000119733	yes
CDKN1A	CDKN1A	CDKN1A	chr6:36644236-36655116	Con	Knockdown	OK	24.4374	73.7072	1.59271	19.0042	5e-05	0.000119733	yes
MIR3687-2	MIR3687-2	MIR3687-2	chr21:9826202-9826263	Con	Knockdown	OK	416.42	1263.04	1.60079	0.815918	0.0576	0.0858663	no
SNORA9	SNORA9	SNORA9	chr7:45022626-45026259	Con	Knockdown	OK	6.23768	19.0189	1.60836	3.01407	0.44805	0.518665	no
ABTB1	ABTB1	ABTB1	chr3:127391780-127399769	Con	Knockdown	OK	1.92244	5.88221	1.61342	5.22396	5e-05	0.000119733	yes
ENTPD7	ENTPD7	ENTPD7	chr10:101419262-101515894	Con	Knockdown	OK	2.99685	9.17422	1.61414	9.81961	5e-05	0.000119733	yes
HIST1H3D	HIST1H3D	HIST1H3D	chr6:26197011-26199521	Con	Knockdown	OK	1.33251	4.09732	1.62054	2.67354	0.00015	0.000342018	yes
SNORD55	SNORD55	SNORD55	chr1:45241245-45244412	Con	Knockdown	OK	199.259	616.898	1.63038	1.10706	0.35985	0.430771	no
MDP1	MDP1	MDP1	chr14:24683142-24701576	Con	Knockdown	OK	2.94999	9.20993	1.64248	0.72701	0.2312	0.293543	no
SCARNA7	SCARNA7	SCARNA7	chr3:160212782-160283376	Con	Knockdown	OK	1.4681	4.59508	1.64614	0.898908	0.3917	0.462965	no
TPRG1L	TPRG1L	TPRG1L	chr1:3541555-3546694	Con	Knockdown	OK	6.06139	19.4165	1.67956	10.5275	5e-05	0.000119733	yes
SNORA63	SNORA63	SNORA63	chr3:186501360-186524484	Con	Knockdown	OK	54.6314	175.67	1.68507	1.34424	0.04605	0.0703319	no
FAM45A	FAM45A	FAM45A	chr10:120863576-120897496	Con	Knockdown	OK	1.01045	3.28442	1.70064	1.30492	0.04845	0.073532	no
KDM7A	KDM7A	KDM7A	chr7:139784545-139876741	Con	Knockdown	OK	3.57475	11.6559	1.70514	13.2275	5e-05	0.000119733	yes
ENPP4	ENPP4	ENPP4	chr6:46097700-46114436	Con	Knockdown	OK	2.05846	6.73584	1.71029	6.41653	5e-05	0.000119733	yes
LMBR1L	LMBR1L	LMBR1L	chr12:49490922-49504683	Con	Knockdown	OK	4.45973	14.7417	1.72488	9.05227	5e-05	0.000119733	yes
SLC46A3	SLC46A3	SLC46A3	chr13:29274217-29293150	Con	Knockdown	OK	1.55037	5.17006	1.73757	5.16078	5e-05	0.000119733	yes
DEAR	DEAR	DEAR	chr4:153242409-153456393	Con	Knockdown	OK	2.65318	9.0989	1.77797	1.13673	0.14695	0.198105	no
SNORA76C	SNORA76C	SNORA76C	chr17:62223698-62223831	Con	Knockdown	OK	5.37671	18.6429	1.79383	3.48836	0.27425	0.34022	no
HIST1H2BC	HIST1H2BC	HIST1H2BC	chr6:26123694-26124132	Con	Knockdown	OK	2.02681	7.03327	1.79499	2.14063	0.0147	0.0246697	yes
SCARNA16	SCARNA16	SCARNA16	chr17:75084724-75213181	Con	Knockdown	OK	13.2626	47.4151	1.83799	1.26547	0.0254	0.0407886	yes
SNORD46	SNORD46	SNORD46	chr1:45241245-45244412	Con	Knockdown	OK	19.4724	71.2384	1.87122	8.36473	0.42335	0.493674	no
HMGA2	HMGA2	HMGA2	chr12:66151799-66360071	Con	Knockdown	OK	15.8105	60.6477	1.93957	16.2945	5e-05	0.000119733	yes
SERF2-C15ORF63	SERF2-C15ORF63	SERF2-C15ORF63	chr15:44038589-44094769	Con	Knockdown	OK	1.61683	6.30424	1.96316	1.27309	0.0983	0.138315	no
SNORA16B	SNORA16B	SNORA16B	chr1:212458878-212535205	Con	Knockdown	OK	6.77217	26.5239	1.9696	4.15305	0.40745	0.478165	no
SCARNA12	SCARNA12	SCARNA12	chr12:7074514-7079916	Con	Knockdown	OK	6.46273	25.5166	1.98122	2.2621	0.06185	0.0915304	no
SCML2	SCML2	SCML2	chrX:18257432-18372844	Con	Knockdown	OK	7.37826	30.199	2.03315	15.7608	5e-05	0.000119733	yes
MIR4800	MIR4800	MIR4800	chr4:2249159-2263739	Con	Knockdown	OK	18.7865	77.2983	2.04074	0.742865	0.41915	0.489713	no
SNORA29	SNORA29	SNORA29	chr6:160181290-160210735	Con	Knockdown	OK	8.63506	35.758	2.04999	6.33672	0.2883	0.355442	no
GPR137B	GPR137B	GPR137B	chr1:236305831-236372209	Con	Knockdown	OK	1.99866	8.36247	2.0649	5.96596	5e-05	0.000119733	yes
SNORD58C	SNORD58C	SNORD58C	chr18:47007547-47018935	Con	Knockdown	OK	46.355	198.196	2.09613	1.22919	0.27785	0.34395	no
SNORD33	SNORD33	SNORD33	chr19:49990810-49995564	Con	Knockdown	OK	44.6049	197.064	2.14339	1.13856	0.4099	0.480505	no
SNORA67	SNORA67	SNORA67	chr17:7465308-7482324	Con	Knockdown	OK	13.4649	70.2619	2.38354	2.20513	0.11985	0.165245	no
SNORA6	SNORA6	SNORA6	chr3:39448179-39454032	Con	Knockdown	OK	4.13005	23.717	2.52169	4.112	0.23085	0.293195	no
SNORA21	SNORA21	SNORA21	chr17:37006320-37010053	Con	Knockdown	OK	8.93426	64.2928	2.84724	2.24331	0.2035	0.263633	no
EGR1	EGR1	EGR1	chr5:137801180-137805004	Con	Knockdown	OK	2.1063	24.7026	3.55188	16.9239	5e-05	0.000119733	yes
